# Supplementary material for: Genome-Wide Association Study of Coronary Heart Disease and Its Risk Factors in 8,090 African Americans: The NHLBI CARe Project
Source: PLOS journal article supplement (doi:10.1371/journal.pgen.1001300), 2011-02-10
Supplement: S11 (10.1371/journal.pgen.1001300.s011) [file journal.pgen.1001300.s011]

**Table S5.** Coronary heart disease replication results for SNPs from the CARe meta-analysis.

| **SNP** | **CHR (POS) 1** | **CARe** | | | | **Replication** | | | **Combined** | | | **Locus** |
| --- | --- | --- | --- | --- | --- | --- | --- | --- | --- | --- | --- | --- |
| **Effect allele (effect allele frequency)2** | **N3** | **OR [95% CI]** | **P-value** | **N3** | **OR [95% CI]** | **P-value** | **OR [95% CI]** | **P-value** | **Heterogeneity Q P-value** |
| rs10888897 | 1 (55285649) | T (0.2) | 260/5053 | 0.87 [0.7-1.07] | 0.1773 | 377/734 | 0.89 [0.74-1.07] | 0.204 | 0.88 [0.76-1.01] | 0.0649 | 0.6361 | PCSK9 |
| rs12066265 | 1 (55285757) | T (0.64) | 260/5053 | 1.03 [0.78-1.35] | 0.8521 | 377/734 | 1.14 [0.88-1.47] | 0.3275 | 1.08 [0.9-1.31] | 0.3992 | 0.6442 | PCSK9 |
| rs11206514 | 1 (55288592) | A (0.13) | 260/5053 | 1.16 [0.92-1.45] | 0.2011 | 244/895 | 1.15 [0.92-1.44] | 0.2156 | 1.15 [0.99-1.35] | 0.07516 | 0.9763 | PCSK9 |
| rs11206517 | 1 (55299016) | T (0.24) | 260/5053 | 1.03 [0.81-1.31] | 0.8033 | 244/895 | 0.94 [0.71-1.22] | 0.6264 | 0.99 [0.83-1.18] | 0.8901 | 0.5967 | PCSK9 |
| rs505151 | 1 (55301775) | A (0.94) | 260/5053 | 0.96 [0.78-1.18] | 0.7002 | 621/1629 | 1.01 [0.87-1.18] | 0.9011 | 0.99 [0.88-1.12] | 0.8986 | 0.5636 | PCSK9 |
| rs640238 | 1 (55366134) | A (0.13) | 260/5053 | 0.95 [0.79-1.14] | 0.5688 | 621/1629 | 0.9 [0.78-1.03] | 0.1128 | 0.91 [0.82-1.02] | 0.1062 | 0.7858 | USP24 |
| rs17111684 | 1 (55398136) | T (0.82) | 260/5053 | 0.82 [0.6-1.11] | 0.2045 | 377/734 | 0.81 [0.61-1.08] | 0.1572 | 0.82 [0.66-1.01] | 0.05746 | 0.7909 | USP24 |
| rs1024305 | 1 (55402792) | A (0.22) | 260/5053 | 0.96 [0.79-1.15] | 0.6288 | 244/895 | 0.96 [0.78-1.18] | 0.6949 | 0.96 [0.84-1.1] | 0.5344 | 0.9719 | USP24 |
| rs11208278 | 1 (63960843) | T (0.57) | 260/5053 | 1.48 [1.23-1.78] | 0.0000348 | 621/1629 | 1.03 [0.9-1.18] | 0.6429 | 1.17 [1.05-1.3] | 0.005147 | 0.007543 |  |
| rs4915649 | 1 (63962226) | T (0.25) | 260/5053 | 1.49 [1.24-1.79] | 0.0000233 | 244/895 | 0.96 [0.78-1.18] | 0.6677 | 1.22 [1.07-1.4] | 0.004136 | 0.00171 |  |
| rs12740374 | 1 (109619113) | T (0.72) | 260/5053 | 0.99 [0.78-1.26] | 0.9453 | 244/895 | 1.07 [0.85-1.35] | 0.5745 | 1.03 [0.87-1.22] | 0.7265 | 0.6568 | CELSR2 |
| rs660240 | 1 (109619361) | T (0.74) | 260/5053 | 0.87 [0.72-1.06] | 0.1726 | 244/895 | 0.99 [0.8-1.22] | 0.9056 | 0.92 [0.8-1.07] | 0.2823 | 0.3966 | CELSR2 |
| rs629301 | 1 (109619829) | T (0.78) | 260/5053 | 1.14 [0.94-1.38] | 0.1922 | 244/895 | 1.03 [0.83-1.26] | 0.8035 | 1.09 [0.94-1.25] | 0.2621 | 0.4776 | CELSR2 |
| rs7538813 | 1 (113497962) | A (0.86) | 260/5053 | 1.67 [1.33-2.1] | 0.0000115 | 377/734 | 0.91 [0.71-1.15] | 0.4139 | 1.24 [1.06-1.47] | 0.009295 | 0.001382 |  |
| rs6697057 | 1 (174774758) | T (0.54) | 260/5053 | 0.53 [0.39-0.7] | 0.0000126 | 621/1629 | 1.06 [0.9-1.26] | 0.4663 | 0.89 [0.77-1.03] | 0.1136 | 0.0003549 | PAPPA2 |
| rs992922 | 1 (174774916) | T (0.37) | 260/5053 | 1.98 [1.48-2.66] | 0.00000511 | 621/1629 | 0.94 [0.79-1.11] | 0.453 | 1.13 [0.98-1.31] | 0.1039 | 0.0001629 | PAPPA2 |
| rs12467895 | 2 (20528250) | T (0.4) | 260/5053 | 3.02 [2.01-4.55] | 0.000000121 | 621/1629 | 0.91 [0.6-1.37] | 0.6406 | 1.66 [1.24-2.22] | 0.0006261 | 0.0005325 |  |
| rs12478448 | 2 (20547801) | T (0.3) | 260/5053 | 1.87 [1.41-2.5] | 0.0000166 | 621/1629 | 0.78 [0.6-1.01] | 0.05575 | 1.15 [0.95-1.4] | 0.1414 | 0.0001056 |  |
| rs16987689 | 2 (20559204) | T (0.46) | 260/5053 | 0.53 [0.37-0.76] | 0.0006397 | 244/895 | 1.24 [0.8-1.92] | 0.3462 | 0.75 [0.56-0.99] | 0.04335 | 0.003614 |  |
| rs1713223 | 2 (21124775) | A (0.98) | 260/5053 | 1.05 [0.86-1.29] | 0.6015 | 621/1629 | 1.02 [0.88-1.18] | 0.7612 | 1.03 [0.92-1.16] | 0.5799 | 0.9759 |  |
| rs562338 | 2 (21141826) | A (0.02) | 260/5053 | 0.92 [0.76-1.11] | 0.3937 | 244/895 | 1 [0.81-1.24] | 0.9997 | 0.96 [0.83-1.1] | 0.5267 | 0.5675 |  |
| rs668948 | 2 (21145034) | A (0.08) | 260/5053 | 1.07 [0.88-1.3] | 0.4856 | 621/1629 | 0.98 [0.86-1.13] | 0.8085 | 1.01 [0.91-1.13] | 0.8378 | 0.1108 |  |
| rs478148 | 2 (21256486) | T (0.6) | 260/5053 | 1.05 [0.87-1.26] | 0.6043 | 244/895 | 0.98 [0.79-1.21] | 0.8503 | 1.02 [0.89-1.17] | 0.7924 | 0.6281 |  |
| rs567071 | 2 (21259295) | A (0.84) | 260/5053 | 0.95 [0.79-1.15] | 0.6205 | 621/1629 | 0.97 [0.85-1.11] | 0.6406 | 0.96 [0.86-1.07] | 0.5033 | 0.8703 |  |
| rs437775 | 2 (21292299) | A (0.3) | 260/5053 | 1.04 [0.83-1.3] | 0.7237 | 621/1629 | 1.02 [0.88-1.19] | 0.7516 | 1.03 [0.91-1.16] | 0.6456 | 0.8325 |  |
| rs436941 | 2 (21292368) | T (0.89) | 260/5053 | 1.04 [0.83-1.3] | 0.7199 | 244/895 | 1.07 [0.85-1.35] | 0.5656 | 1.06 [0.9-1.24] | 0.5116 | 0.8665 |  |
| rs365946 | 2 (21292834) | T (0.08) | 260/5053 | 0.93 [0.75-1.14] | 0.4639 | 377/734 | 1.1 [0.91-1.32] | 0.3405 | 1.01 [0.88-1.17] | 0.8371 | 0.32 |  |
| rs13015955 | 2 (22675664) | A (0.89) | 260/5053 | 1.21 [0.77-1.9] | 0.4195 | 377/734 | 1.3 [0.9-1.86] | 0.1574 | 1.26 [0.95-1.67] | 0.1075 | 0.9665 |  |
| rs11693439 | 2 (29620117) | T (0.05) | 260/5053 | 0.72 [0.43-1.23] | 0.2299 | 621/1629 | 1.23 [0.9-1.67] | 0.191 | 1.07 [0.82-1.4] | 0.5947 | 0.2483 | ALK |
| rs11676871 | 2 (29620365) | A (0.89) | 260/5053 | 1.32 [0.76-2.29] | 0.3301 | 244/895 | 0.67 [0.42-1.06] | 0.08802 | 0.88 [0.62-1.26] | 0.4961 | 0.06539 | ALK |
| rs16840888 | 2 (157362464) | T (0.49) | 260/5053 | 2.23 [1.56-3.19] | 0.0000122 | 377/734 | 0.93 [0.7-1.23] | 0.6018 | 1.29 [1.04-1.61] | 0.0225 | 0.0005645 |  |
| rs7559337 | 2 (164273014) | A (0.87) | 260/5053 | 2.8 [1.75-4.5] | 0.0000201 | 377/734 | 0.91 [0.63-1.33] | 0.6375 | 1.4 [1.05-1.88] | 0.02361 | 0.000433 | FIGN |
| rs2080401 | 2 (171249069) | A (0.06) | 260/5053 | 1.08 [0.89-1.31] | 0.4467 | 244/895 | 1.2 [0.97-1.48] | 0.1005 | 1.13 [0.98-1.31] | 0.09515 | 0.4832 |  |
| rs6706901 | 2 (171252417) | A (0.49) | 260/5053 | 0.94 [0.78-1.14] | 0.5236 | 621/1629 | 0.99 [0.86-1.14] | 0.8636 | 0.97 [0.87-1.09] | 0.6049 | 0.2278 |  |
| rs4234057 | 2 (225986545) | A (0.16) | 260/5053 | 0.72 [0.52-1] | 0.0528 | 244/895 | 0.85 [0.59-1.24] | 0.4057 | 0.78 [0.61-0.99] | 0.04521 | 0.5122 | KIAA1486 |
| rs13015496 | 2 (225998949) | C (0.08) | 260/5053 | 1.68 [1.31-2.15] | 0.0000335 | 621/1629 | 1.08 [0.88-1.33] | 0.4472 | 1.3 [1.11-1.52] | 0.001162 | 0.006015 | KIAA1486 |
| rs9870041 | 3 (63067331) | A (0.92) | 260/5053 | 0.81 [0.67-0.98] | 0.02925 | 244/895 | 0.85 [0.69-1.05] | 0.1389 | 0.83 [0.72-0.95] | 0.009043 | 0.7219 |  |
| rs1374689 | 3 (63085178) | A (0.03) | 260/5053 | 1.77 [1.39-2.26] | 0.00000428 | 621/1629 | 1.03 [0.9-1.18] | 0.6364 | 1.17 [1.04-1.31] | 0.009232 | 0.0008478 |  |
| rs9823642 | 3 (80556029) | A (0.11) | 260/5053 | 5.69 [2.8-11.53] | 0.00000144 | 377/734 | 1.36 [0.58-3.17] | 0.4812 | 3.16 [1.84-5.44] | 3.27E-05 | 0.007832 |  |
| rs11711292 | 3 (139212484) | A (0.05) | 260/5053 | 2.45 [1.71-3.51] | 0.000000973 | 244/895 | 1.15 [0.73-1.81] | 0.5489 | 1.83 [1.38-2.43] | 2.47E-05 | 0.0105 | CLDN18 |
| rs7669563 | 4 (174178414) | T (0.95) | 260/5053 | 1.32 [1.08-1.61] | 0.005709 | 621/1629 | 1.02 [0.89-1.17] | 0.7629 | 1.11 [0.99-1.24] | 0.06978 | 0.0579 | GALNT17 |
| rs10020676 | 4 (174182305) | A (0.36) | 260/5053 | 1.48 [1.23-1.79] | 0.0000348 | 244/895 | 0.94 [0.77-1.16] | 0.5776 | 1.21 [1.05-1.38] | 0.007553 | 0.001317 | GALNT17 |
| rs4702348 | 5 (6473219) | T (0.03) | 260/5053 | 1.58 [1.27-1.95] | 0.0000314 | 377/734 | 0.9 [0.73-1.12] | 0.3444 | 1.19 [1.02-1.39] | 0.0232 | 0.0006625 |  |
| rs17141732 | 5 (116777749) | T (0.05) | 260/5053 | 0.42 [0.29-0.61] | 0.00000484 | 621/1629 | 1.27 [0.88-1.83] | 0.1996 | 0.74 [0.57-0.96] | 0.02174 | 0.0005241 |  |
| rs17141763 | 5 (116800012) | C (0.39) | 260/5053 | 0.5 [0.33-0.77] | 0.001673 | 244/895 | 1.36 [0.69-2.71] | 0.3743 | 0.67 [0.46-0.96] | 0.02807 | 0.01566 |  |
| rs17577085 | 5 (141843788) | T (0.54) | 260/5053 | 0.3 [0.17-0.51] | 0.0000107 | 377/734 | 0.53 [0.29-1] | 0.04822 | 0.38 [0.26-0.58] | 3.85E-06 | 0.3659 |  |
| rs249923 | 5 (141995573) | T (0.03) | 260/5053 | 1.47 [1.11-1.96] | 0.007642 | 244/895 | 1.26 [0.92-1.73] | 0.142 | 1.37 [1.11-1.7] | 0.003075 | 0.4776 | FGF1 |
| rs7726976 | 5 (164192302) | T (0.88) | 260/5053 | 1.51 [1.25-1.83] | 0.0000178 | 377/734 | 0.9 [0.75-1.08] | 0.2629 | 1.16 [1.02-1.33] | 0.02706 | 0.0003127 |  |
| rs1422958 | 5 (173354988) | T (0.36) | 260/5053 | 1.67 [1.29-2.17] | 0.0000973 | 621/1629 | 1.06 [0.93-1.21] | 0.3753 | 1.17 [1.04-1.32] | 0.00999 | 0.01423 | LOC133491 |
| rs6556100 | 5 (173367014) | T (0.09) | 260/5053 | 0.77 [0.64-0.94] | 0.009583 | 244/895 | 0.9 [0.73-1.1] | 0.3049 | 0.83 [0.72-0.96] | 0.009589 | 0.3031 |  |
| rs6597279 | 6 (7629623) | T (0.14) | 260/5053 | 0.48 [0.35-0.66] | 0.0000083 | 377/734 | 1.07 [0.74-1.53] | 0.7262 | 0.69 [0.54-0.87] | 0.002054 | 0.002114 |  |
| rs1332845 | 6 (13000442) | A (0.43) | 260/5053 | 1.31 [0.98-1.76] | 0.06493 | 244/895 | 1.15 [0.86-1.52] | 0.3396 | 1.23 [1-1.5] | 0.0485 | 0.5135 | PHACTR1 |
| rs1332847 | 6 (13000740) | T (0.96) | 260/5053 | 0.85 [0.65-1.11] | 0.2304 | 621/1629 | 0.94 [0.79-1.12] | 0.5151 | 0.91 [0.79-1.06] | 0.228 | 0.6158 | PHACTR1 |
| rs6910007 | 6 (42174781) | A (0.83) | 260/5053 | 2.7 [1.69-4.3] | 0.0000311 | 377/734 | 0.84 [0.54-1.33] | 0.4641 | 1.48 [1.07-2.05] | 0.01758 | 0.001729 |  |
| rs6588688 | 6 (58544196) | C (0.64) | 260/5053 | 0.58 [0.45-0.75] | 0.0000359 | 401/1229 | 1.04 [0.88-1.23] | 0.6145 | 0.88 [0.77-1.01] | 0.07086 | 0.0005967 |  |
| rs1224813 | 6 (58585230) | A (0.76) | 260/5053 | 0.89 [0.73-1.09] | 0.2751 | 244/895 | 1.08 [0.87-1.36] | 0.4801 | 0.97 [0.84-1.13] | 0.7394 | 0.2087 |  |
| rs7743894 | 6 (131575081) | T (0.99) | 260/5053 | 1.77 [1.3-2.41] | 0.000263 | 244/895 | 1 [0.69-1.43] | 0.9807 | 1.39 [1.1-1.76] | 0.005512 | 0.01785 | AKAP7 |
| rs17573187 | 6 (131576402) | A (0.74) | 260/5053 | 2.38 [1.67-3.39] | 0.0000017 | 621/1629 | 0.93 [0.73-1.19] | 0.5735 | 1.25 [1.03-1.53] | 0.02694 | 0.0003181 | AKAP7 |
| rs9403856 | 6 (147801227) | T (0.03) | 260/5053 | 1.96 [1.19-3.25] | 0.008546 | 244/895 | 0.76 [0.41-1.43] | 0.3997 | 1.36 [0.92-2.01] | 0.1279 | 0.02127 |  |
| rs325105 | 6 (147805960) | T (0.46) | 260/5053 | 2.06 [1.5-2.83] | 0.00000773 | 621/1629 | 1.15 [0.91-1.44] | 0.2368 | 1.4 [1.17-1.69] | 0.0003494 | 0.006682 |  |
| rs7757997 | 6 (160602887) | A (0.23) | 260/5053 | 0.94 [0.73-1.19] | 0.5878 | 621/1629 | 1.05 [0.88-1.24] | 0.6021 | 1.01 [0.88-1.16] | 0.9059 | 0.835 |  |
| rs1567441 | 6 (160732252) | T (0.51) | 260/5053 | 1.16 [0.69-1.95] | 0.5675 | 377/734 | 0.82 [0.56-1.18] | 0.2803 | 0.92 [0.68-1.24] | 0.5852 | 0.4255 | SLC22A3 |
| rs2136675 | 6 (160816421) | A (0.1) | 260/5053 | 1.07 [0.81-1.42] | 0.6396 | 621/1629 | 1.04 [0.88-1.22] | 0.6586 | 1.05 [0.91-1.21] | 0.5366 | 0.7506 | LPAL2 |
| rs2457569 | 6 (160824246) | C (0.33) | 260/5053 | 1.04 [0.79-1.37] | 0.7727 | 244/895 | 1.01 [0.75-1.34] | 0.9716 | 1.02 [0.84-1.25] | 0.8145 | 0.8636 | LPAL2 |
| rs9365166 | 6 (160831898) | T (0.09) | 260/5053 | 0.92 [0.73-1.15] | 0.456 | 621/1629 | 1.02 [0.88-1.2] | 0.765 | 0.99 [0.87-1.12] | 0.8687 | 0.8712 | LPAL2 |
| rs9347408 | 6 (160836326) | T (0.18) | 260/5053 | 1.1 [0.87-1.39] | 0.4306 | 244/895 | 1 [0.79-1.28] | 0.9702 | 1.05 [0.89-1.24] | 0.5517 | 0.6042 | LPAL2 |
| rs6919346 | 6 (160880349) | T (0.18) | 260/5053 | 0.98 [0.46-2.09] | 0.9624 | 377/734 | 1.36 [0.89-2.07] | 0.1539 | 1.26 [0.87-1.82] | 0.2217 | 0.2162 | LPA |
| rs9355296 | 6 (160937983) | A (0.51) | 260/5053 | 0.88 [0.58-1.33] | 0.5396 | 621/1629 | 0.88 [0.69-1.13] | 0.3048 | 0.88 [0.71-1.09] | 0.2319 | 0.4594 | LPA |
| rs9457986 | 6 (160989280) | T (0.04) | 260/5053 | 1.05 [0.83-1.34] | 0.6693 | 377/734 | 0.88 [0.7-1.12] | 0.3089 | 0.96 [0.81-1.14] | 0.6683 | 0.3752 | LPA |
| rs1321196 | 6 (161001832) | T (0.13) | 260/5053 | 1.17 [0.97-1.42] | 0.1092 | 377/734 | 1.1 [0.91-1.32] | 0.3217 | 1.13 [0.99-1.29] | 0.06832 | 0.203 | LPA |
| rs1652507 | 6 (161002451) | T (0.48) | 260/5053 | 1.14 [0.79-1.63] | 0.4783 | 621/1629 | 1.17 [0.93-1.47] | 0.1777 | 1.16 [0.96-1.41] | 0.1291 | 0.1337 | LPA |
| rs1367211 | 6 (161002685) | T (0.07) | 260/5053 | 0.91 [0.76-1.09] | 0.3067 | 244/895 | 0.96 [0.79-1.17] | 0.6933 | 0.93 [0.82-1.07] | 0.3086 | 0.6851 | LPA |
| rs1367209 | 6 (161002837) | A (0.46) | 260/5053 | 1.1 [0.92-1.32] | 0.304 | 401/1229 | 0.97 [0.83-1.13] | 0.6952 | 1.02 [0.91-1.15] | 0.7095 | 0.2908 | LPA |
| rs4252072 | 6 (161048254) | A (0.01) | 260/5053 | 0.8 [0.65-0.98] | 0.03532 | 377/734 | 0.93 [0.77-1.12] | 0.448 | 0.87 [0.75-1] | 0.04724 | 0.3148 | PLG |
| rs4252125 | 6 (161072230) | A (0.04) | 260/5053 | 1.1 [0.87-1.39] | 0.4417 | 377/734 | 1.22 [0.97-1.53] | 0.09189 | 1.16 [0.98-1.36] | 0.08085 | 0.7882 | PLG |
| rs4252165 | 6 (161081549) | A (0.21) | 260/5053 | 0.92 [0.7-1.2] | 0.5235 | 377/734 | 1.17 [0.93-1.45] | 0.1752 | 1.06 [0.89-1.25] | 0.5259 | 0.1762 | PLG |
| rs6455767 | 6 (162068325) | T (0.23) | 260/5053 | 0.98 [0.79-1.21] | 0.8376 | 244/895 | 0.88 [0.7-1.12] | 0.2917 | 0.93 [0.79-1.09] | 0.3872 | 0.5239 | PARK2 |
| rs9458348 | 6 (162069529) | T (0.46) | 260/5053 | 0.95 [0.75-1.2] | 0.6694 | 621/1629 | 0.98 [0.84-1.13] | 0.7571 | 0.97 [0.86-1.1] | 0.6236 | 0.8611 | PARK2 |
| rs672436 | 7 (108445377) | A (0.16) | 260/5053 | 2.05 [1.48-2.83] | 0.0000144 | 621/1629 | 1.18 [0.91-1.55] | 0.2165 | 1.48 [1.2-1.82] | 0.0001983 | 0.001687 |  |
| rs175691 | 7 (108456791) | T (0.58) | 260/5053 | 0.49 [0.35-0.67] | 0.0000103 | 244/895 | 1.39 [0.88-2.18] | 0.1538 | 0.69 [0.53-0.9] | 0.005604 | 0.0002022 |  |
| rs10261591 | 7 (110577243) | T (0.27) | 260/5053 | 0.67 [0.55-0.81] | 0.0000302 | 621/1629 | 1.1 [0.97-1.26] | 0.1367 | 0.94 [0.84-1.05] | 0.2556 | 0.0002875 | IMMP2L |
| rs12531194 | 7 (123790237) | A (0.99) | 260/5053 | 1.48 [1.22-1.79] | 0.0000554 | 244/895 | 1.2 [0.98-1.47] | 0.08179 | 1.34 [1.17-1.54] | 3.64E-05 | 0.1364 |  |
| rs7802554 | 7 (123790537) | A (0.19) | 260/5053 | 0.75 [0.62-0.91] | 0.00286 | 621/1629 | 1.02 [0.89-1.16] | 0.8063 | 0.92 [0.83-1.03] | 0.1397 | 0.004984 |  |
| rs1990087 | 7 (123801420) | T (0.38) | 260/5053 | 0.64 [0.52-0.8] | 0.0000689 | 244/895 | 0.86 [0.69-1.08] | 0.1897 | 0.74 [0.64-0.87] | 0.0001766 | 0.06124 |  |
| rs7783449 | 7 (123803999) | A (0.04) | 260/5053 | 0.64 [0.52-0.8] | 0.000063 | 621/1629 | 0.98 [0.86-1.13] | 0.8117 | 0.87 [0.77-0.98] | 0.01811 | 0.005104 |  |
| rs13232179 | 7 (150751881) | A (0.11) | 260/5053 | 1.87 [1.43-2.44] | 0.00000363 | 244/895 | 1.39 [0.99-1.95] | 0.05414 | 1.67 [1.36-2.06] | 1.37E-06 | 0.1764 |  |
| rs1558299 | 7 (150752609) | T (0.09) | 260/5053 | 1.92 [1.47-2.52] | 0.00000169 | 621/1629 | 1.13 [0.91-1.4] | 0.2798 | 1.39 [1.18-1.65] | 0.0001173 | 0.005761 |  |
| rs11771304 | 7 (151279137) | A (0.33) | 260/5053 | 2.1 [1.47-3.01] | 0.0000493 | 377/734 | 0.97 [0.67-1.41] | 0.8814 | 1.45 [1.12-1.88] | 0.004803 | 0.01142 |  |
| rs7018428 | 8 (72114904) | T (0.46) | 260/5053 | 2.17 [1.6-2.95] | 0.000000663 | 377/734 | 0.94 [0.67-1.32] | 0.7218 | 1.49 [1.19-1.86] | 0.0005935 | 8.87E-05 |  |
| rs2930733 | 9 (7649530) | C (0.81) | 260/5053 | 1.41 [1.1-1.79] | 0.005576 | 244/895 | 0.95 [0.77-1.16] | 0.6051 | 1.12 [0.96-1.31] | 0.1564 | 0.01478 |  |
| rs3005759 | 9 (7649978) | C (0.23) | 260/5053 | 1.51 [1.26-1.81] | 0.0000103 | 621/1629 | 0.98 [0.85-1.11] | 0.7111 | 1.13 [1.02-1.26] | 0.02119 | 0.002398 |  |
| rs6475606 | 9 (22071850) | T (0.96) | 260/5053 | 1.99 [1.34-2.96] | 0.0006411 | 244/895 | 0.97 [0.7-1.33] | 0.8385 | 1.29 [1-1.65] | 0.04686 | 0.005376 |  |
| rs1333042 | 9 (22093813) | A (0.66) | 260/5053 | 0.57 [0.39-0.84] | 0.003959 | 621/1629 | 1.14 [0.94-1.4] | 0.186 | 0.99 [0.83-1.18] | 0.8713 | 0.003933 |  |
| rs2265264 | 10 (24878277) | A (0.96) | 260/5053 | 1.68 [1.31-2.16] | 0.0000543 | 377/734 | 0.93 [0.73-1.18] | 0.5419 | 1.23 [1.03-1.46] | 0.02007 | 0.001913 |  |
| rs7097254 | 10 (126502238) | A (0.81) | 260/5053 | 0.67 [0.56-0.81] | 0.0000245 | 621/1629 | 1.04 [0.91-1.19] | 0.5848 | 0.89 [0.8-1] | 0.04391 | 0.0007512 | KIAA0157 |
| rs11245387 | 10 (126527815) | T (0.89) | 260/5053 | 1.5 [1.25-1.82] | 0.0000219 | 244/895 | 0.87 [0.71-1.07] | 0.1996 | 1.17 [1.02-1.35] | 0.02406 | 0.0001345 |  |
| rs7104171 | 11 (91589432) | T (0.71) | 260/5053 | 0.66 [0.54-0.81] | 0.0000762 | 244/895 | 0.99 [0.8-1.22] | 0.9103 | 0.8 [0.69-0.93] | 0.003675 | 0.007183 |  |
| rs10830888 | 11 (91591095) | T (0.32) | 260/5053 | 1.49 [1.23-1.8] | 0.0000559 | 621/1629 | 0.97 [0.84-1.11] | 0.6255 | 1.12 [1-1.25] | 0.05408 | 0.00204 |  |
| rs7114271 | 11 (91594398) | T (0.97) | 260/5053 | 1.53 [1.25-1.86] | 0.000026 | 621/1629 | 0.96 [0.84-1.1] | 0.5504 | 1.11 [0.99-1.24] | 0.0632 | 0.002035 |  |
| rs1458205 | 11 (91605030) | A (0.37) | 260/5053 | 1.41 [1.16-1.72] | 0.0005287 | 244/895 | 0.98 [0.79-1.21] | 0.8477 | 1.19 [1.03-1.38] | 0.01588 | 0.01259 |  |
| rs1559836 | 12 (112778953) | T (0.9) | 260/5053 | 2 [1.43-2.79] | 0.0000512 | 621/1629 | 1.12 [0.85-1.48] | 0.4105 | 1.42 [1.15-1.76] | 0.0013 | 0.07223 | RBM19 |
| rs3825209 | 12 (112835440) | T (0.39) | 260/5053 | 0.83 [0.52-1.32] | 0.4206 | 244/895 | 1.74 [0.88-3.47] | 0.1134 | 1.04 [0.71-1.54] | 0.8245 | 0.07799 | RBM19 |
| rs9545792 | 13 (81050210) | T (0.47) | 260/5053 | 0.33 [0.2-0.53] | 0.00000506 | 377/734 | 1.24 [0.84-1.83] | 0.2836 | 0.73 [0.54-0.98] | 0.03921 | 5.93E-05 |  |
| rs9531594 | 13 (83942996) | A (0.21) | 260/5053 | 1.81 [1.34-2.45] | 0.0001108 | 244/895 | 1.22 [0.86-1.73] | 0.2741 | 1.53 [1.22-1.92] | 0.0002668 | 0.09124 |  |
| rs9546711 | 13 (83952267) | A (0.42) | 260/5053 | 1.91 [1.43-2.54] | 0.00000949 | 377/734 | 1.43 [1.06-1.92] | 0.01925 | 1.66 [1.35-2.04] | 1.50E-06 | 0.1461 |  |
| rs7350723 | 14 (89261911) | A (0.79) | 260/5053 | 1.62 [1.28-2.06] | 0.0000618 | 244/895 | 1.28 [1.01-1.62] | 0.03878 | 1.44 [1.22-1.71] | 1.79E-05 | 0.166 |  |
| rs7158998 | 14 (89263874) | A (0.6) | 260/5053 | 1.63 [1.29-2.06] | 0.0000504 | 401/1229 | 1.22 [1.01-1.46] | 0.03434 | 1.35 [1.17-1.56] | 3.36E-05 | 0.06585 |  |
| rs11856277 | 15 (27509380) | A (0.55) | 260/5053 | 0.74 [0.6-0.91] | 0.003645 | 244/895 | 1.11 [0.86-1.43] | 0.4391 | 0.86 [0.74-1.01] | 0.07447 | 0.01538 |  |
| rs11852742 | 15 (71013594) | A (0.96) | 260/5053 | 2.13 [1.51-3.02] | 0.000019 | 377/734 | 0.93 [0.58-1.49] | 0.7681 | 1.59 [1.2-2.1] | 0.00112 | 0.01289 |  |
| rs9924964 | 16 (70643062) | A (0.18) | 260/5053 | 1.01 [0.8-1.26] | 0.9625 | 621/1629 | 0.97 [0.84-1.13] | 0.7435 | 0.98 [0.87-1.12] | 0.8057 | 0.3832 |  |
| rs2550035 | 16 (70670917) | C (0.68) | 260/5053 | 1.01 [0.81-1.25] | 0.9578 | 244/895 | 1.07 [0.86-1.35] | 0.5354 | 1.04 [0.89-1.21] | 0.6395 | 0.6823 |  |
| rs8059437 | 16 (70673968) | A (0.78) | 260/5053 | 0.98 [0.78-1.23] | 0.8849 | 621/1629 | 1.03 [0.89-1.2] | 0.6926 | 1.02 [0.9-1.15] | 0.8038 | 0.4051 |  |
| rs9928157 | 16 (70674574) | T (0.09) | 260/5053 | 0.99 [0.79-1.25] | 0.96 | 244/895 | 1.2 [0.95-1.51] | 0.1271 | 1.09 [0.93-1.28] | 0.3035 | 0.2595 |  |
| rs9895660 | 17 (48255397) | T (0.7) | 260/5053 | 0.57 [0.44-0.74] | 0.000022 | 377/734 | 1.11 [0.84-1.48] | 0.4623 | 0.77 [0.64-0.93] | 0.008017 | 0.003151 |  |
| rs17823412 | 17 (66276676) | T (0.45) | 260/5053 | 0.69 [0.52-0.9] | 0.006953 | 244/895 | 1.16 [0.83-1.63] | 0.3781 | 0.85 [0.68-1.05] | 0.1218 | 0.01724 |  |
| rs7222110 | 17 (66285786) | T (0.16) | 260/5053 | 1.66 [1.32-2.09] | 0.0000129 | 621/1629 | 0.95 [0.79-1.14] | 0.5659 | 1.18 [1.02-1.36] | 0.02421 | 0.0005753 |  |
| rs674465 | 18 (4322857) | A (0.58) | 260/5053 | 0.42 [0.3-0.59] | 0.000000662 | 244/895 | 0.93 [0.71-1.23] | 0.6182 | 0.68 [0.55-0.85] | 0.0004991 | 0.0003353 |  |
| rs573815 | 18 (4323263) | A (0.72) | 260/5053 | 2.49 [1.76-3.52] | 0.000000232 | 244/895 | 1.07 [0.8-1.43] | 0.642 | 1.51 [1.21-1.89] | 0.0002456 | 0.0002378 |  |
| rs7234633 | 18 (59459275) | A (0.69) | 260/5053 | 1 [0.78-1.28] | 0.9769 | 377/734 | 1.02 [0.8-1.29] | 0.9042 | 1.01 [0.85-1.2] | 0.948 | 0.9166 | SERPINB4 |
| rs11671653 | 19 (10699486) | A (0.38) | 260/5053 | 1.02 [0.75-1.39] | 0.8812 | 621/1629 | 1.04 [0.83-1.29] | 0.7394 | 1.03 [0.86-1.23] | 0.7209 | 0.819 | DNM2 |
| rs1560734 | 19 (10702049) | T (0.75) | 260/5053 | 0.97 [0.71-1.32] | 0.852 | 244/895 | 1.08 [0.77-1.52] | 0.6593 | 1.02 [0.81-1.28] | 0.8743 | 0.6514 | DNM2 |
| rs6511720 | 19 (11063306) | T (0.27) | 260/5053 | 1.1 [0.73-1.66] | 0.6567 | 377/734 | 0.97 [0.74-1.28] | 0.8477 | 1.01 [0.8-1.27] | 0.9338 | 0.7387 | LDLR |
| rs3852857 | 19 (50065379) | C (0.22) | 260/5053 | 0.98 [0.79-1.23] | 0.8914 | 244/895 | 1.09 [0.86-1.38] | 0.4701 | 1.03 [0.88-1.21] | 0.6898 | 0.537 | PVRL2 |
| rs4081918 | 19 (50065579) | A (0.45) | 260/5053 | 1.02 [0.81-1.27] | 0.8902 | 621/1629 | 0.84 [0.72-0.99] | 0.03354 | 0.9 [0.79-1.02] | 0.09785 | 0.3586 | PVRL2 |
| rs1160985 | 19 (50095252) | T (0.28) | 260/5053 | 1.05 [0.86-1.27] | 0.6281 | 377/734 | 0.93 [0.77-1.11] | 0.4124 | 0.98 [0.86-1.12] | 0.7862 | 0.1352 | TOMM40 |
| rs12721054 | 19 (50114427) | A (0.86) | 260/5053 | 0.78 [0.59-1.02] | 0.07184 | 377/734 | 1.15 [0.87-1.53] | 0.3309 | 0.94 [0.77-1.14] | 0.5318 | 0.1352 | APOC1 |
| rs4801281 | 19 (61023061) | T (0.39) | 260/5053 | 0.56 [0.43-0.73] | 0.0000276 | 621/1629 | 0.97 [0.83-1.13] | 0.6596 | 0.85 [0.74-0.97] | 0.01497 | 0.0008525 | NLRP11 |
| rs2547266 | 19 (61025475) | A (0.91) | 260/5053 | 1.78 [1.36-2.33] | 0.0000297 | 244/895 | 0.86 [0.67-1.11] | 0.247 | 1.2 [1-1.44] | 0.0491 | 0.0001135 | NLRP11 |
| rs2547285 | 19 (61033767) | A (0.06) | 260/5053 | 0.87 [0.71-1.06] | 0.1741 | 244/895 | 1 [0.8-1.25] | 0.9918 | 0.93 [0.8-1.08] | 0.3215 | 0.3522 | NLRP11 |
| rs8103007 | 19 (61033873) | A (0.19) | 260/5053 | 1.56 [1.27-1.92] | 0.000031 | 621/1629 | 1.02 [0.87-1.19] | 0.8494 | 1.19 [1.05-1.35] | 0.007484 | 0.002375 | NLRP11 |
| rs2424510 | 20 (22991550) | C (0.86) | 260/5053 | 0.64 [0.52-0.79] | 0.000031 | 621/1629 | 0.84 [0.73-0.96] | 0.01095 | 0.77 [0.69-0.87] | 1.06E-05 | 0.07267 |  |
| rs6036291 | 20 (22992075) | A (0.27) | 260/5053 | 0.64 [0.52-0.79] | 0.00004 | 244/895 | 0.96 [0.77-1.19] | 0.7008 | 0.78 [0.67-0.91] | 0.001318 | 0.009542 |  |
| rs396448 | 20 (37695585) | T (0.67) | 260/5053 | 1.51 [1.23-1.85] | 0.0000713 | 621/1629 | 0.99 [0.85-1.16] | 0.9428 | 1.16 [1.02-1.31] | 0.0198 | 0.001176 |  |
| rs396057 | 20 (37695707) | T (0.58) | 260/5053 | 0.7 [0.57-0.85] | 0.0004129 | 244/895 | 0.96 [0.76-1.2] | 0.715 | 0.8 [0.69-0.93] | 0.003729 | 0.04067 |  |
| rs2870735 | 20 (54283063) | A (0.17) | 260/5053 | 1.8 [1.36-2.38] | 0.0000375 | 377/734 | 0.88 [0.64-1.22] | 0.4373 | 1.33 [1.07-1.64] | 0.008866 | 0.00439 |  |
| rs6008397 | 22 (46572839) | T (0.65) | 260/5053 | 0.72 [0.53-0.96] | 0.02826 | 157/334 | 1.27 [0.8-2.01] | 0.3179 | 0.85 [0.66-1.09] | 0.1927 | 0.04247 |  |
| rs5768002 | 22 (46578444) | A (0.06) | 260/5053 | 0.64 [0.51-0.79] | 0.0000564 | 244/895 | 1.03 [0.77-1.36] | 0.854 | 0.76 [0.64-0.91] | 0.002157 | 0.008924 |  |
| 1Chromosomal position given on NCBI Build 36.1. 2The reference allele is on the forward strand. 3Number of cases/number of controls. | | | | | | | | | | | | |
