# Supplementary material for: Genome-Wide Association Study of Coronary Heart Disease and Its Risk Factors in 8,090 African Americans: The NHLBI CARe Project
Source: PLOS journal article supplement (doi:10.1371/journal.pgen.1001300), 2011-02-10
Supplement: S14 (10.1371/journal.pgen.1001300.s014) [file journal.pgen.1001300.s014]

**Table S8.** LDL-C replication results for SNPs from the CARe meta-analysis.

| **SNP** | **CHR (POS) 1** | **CARe** | | | | **Replication** | | | **Combined** | | | **Locus** |
| --- | --- | --- | --- | --- | --- | --- | --- | --- | --- | --- | --- | --- |
| **Effect allele (effect allele frequency)2** | **N** | **Beta (SE)** | **P-value** | **N** | **Z-score** | **P-value** | **Z-score** | **P-value** | **Heterogeneity Q P-value** |
| rs2341260 | 1 (73826648) | T (0.83) | 7565 | 0.0767 (0.0222) | 0.000544 | 3880 | 0.0018 (0.0301) | 0.9528 | 0.0503 (0.0179) | 4.85E-03 | 0.1802 |  |
| rs4540593 | 1 (73843197) | T (0.17) | 7565 | -0.0906 (0.0225) | 5.65E-05 | 3905 | 0.0001 (0.0301) | 0.9983 | -0.0581 (0.018) | 1.26E-03 | 0.08691 |  |
| rs611917 | 1 (109616775) | A (0.65) | 7565 | 0.1353 (0.0191) | 1.47E-12 | 3861 | 0.1422 (0.0239) | 2.79E-09 | 0.138 (0.0149) | 2.37E-20 | 0.6908 | CELSR2 |
| rs7528419 | 1 (109618715) | A (0.73) | 7565 | 0.1603 (0.0208) | 1.22E-14 | 2669 | 0.1749 (0.0305) | 1.019E-08 | 0.1649 (0.0172) | 8.49E-22 | 0.5423 | CELSR2 |
| rs12740374 | 1 (109619113) | T (0.25) | 7565 | -0.1744 (0.0208) | 5.75E-17 | 3867 | -0.1927 (0.0262) | 2.039E-13 | -0.1815 (0.0163) | 8.56E-29 | 0.412 | CELSR2 |
| rs660240 | 1 (109619361) | T (0.37) | 7565 | -0.1325 (0.0176) | 5.67E-14 | 1457 | -0.1064 (0.038) | 0.005148 | -0.1279 (0.016) | 1.17E-15 | 0.8757 | CELSR2 |
| rs629301 | 1 (109619829) | T (0.64) | 7565 | 0.1329 (0.0173) | 1.55E-14 | 1134 | 0.1146 (0.0434) | 0.008293 | 0.1304 (0.0161) | 4.92E-16 | 0.7755 | CELSR2 |
| rs646776 | 1 (109620053) | T (0.65) | 7565 | 0.1325 (0.0175) | 4.05E-14 | 3868 | 0.1319 (0.0238) | 3.198E-08 | 0.1323 (0.0141) | 6.85E-21 | 0.9494 | CELSR2 |
| rs583104 | 1 (109622830) | T (0.26) | 7565 | 0.0719 (0.0195) | 0.000233 | 2751 | 0.0857 (0.0314) | 0.006371 | 0.0757 (0.0166) | 4.84E-06 | 0.5223 |  |
| rs602633 | 1 (109623034) | T (0.73) | 7565 | -0.0709 (0.0194) | 0.000264 | 3874 | -0.0759 (0.026) | 0.003437 | -0.0727 (0.0155) | 2.89E-06 | 0.6502 |  |
| rs599839 | 1 (109623689) | A (0.26) | 7565 | 0.0738 (0.0194) | 0.000147 | 3892 | 0.0768 (0.026) | 0.003196 | 0.0749 (0.0156) | 1.49E-06 | 0.6376 | PSRC1 |
| rs2807931 | 1 (112562480) | T (0.37) | 7565 | 0.0697 (0.0175) | 0.000068 | 1134 | -0.0597 (0.0446) | 0.1805 | 0.0524 (0.0163) | 1.29E-03 | 0.007588 |  |
| rs1416203 | 1 (112563816) | A (0.35) | 7565 | 0.0709 (0.0175) | 4.91E-05 | 3884 | 0.0198 (0.0246) | 0.4208 | 0.0537 (0.0143) | 1.66E-04 | 0.1126 |  |
| rs744487 | 1 (232792635) | A (0.72) | 7565 | -0.0751 (0.0188) | 6.31E-05 | 3881 | -0.0578 (0.0256) | 0.02377 | -0.069 (0.0151) | 5.18E-06 | 0.8308 |  |
| rs11581667 | 1 (232792979) | T (0.26) | 7565 | 0.066 (0.0192) | 0.000588 | 1134 | 0.0445 (0.0474) | 0.3473 | 0.063 (0.0178) | 4.02E-04 | 0.7257 |  |
| rs10201852 | 2 (17333135) | A (0.54) | 7565 | 0.0666 (0.0167) | 6.51E-05 | 3877 | 0.0289 (0.023) | 0.2081 | 0.0536 (0.0135) | 7.29E-05 | 0.6459 |  |
| rs10189943 | 2 (17333301) | A (0.45) | 7565 | -0.0666 (0.0166) | 6.37E-05 | 1134 | -0.0595 (0.0427) | 0.1638 | -0.0657 (0.0155) | 2.20E-05 | 0.8968 |  |
| rs16983526 | 2 (17372452) | C (0.8) | 7565 | 0.0896 (0.021) | 2.01E-05 | 2776 | 0.04 (0.033) | 0.2255 | 0.0753 (0.0177) | 2.13E-05 | 0.5976 |  |
| rs7569328 | 2 (20964259) | T (0.15) | 7565 | -0.1013 (0.0232) | 1.31E-05 | 3872 | -0.096 (0.032) | 0.002676 | -0.0995 (0.0188) | 1.17E-07 | 0.6336 |  |
| rs13015955 | 2 (22675664) | A (0.05) | 7565 | 0.1806 (0.0392) | 0.000004 | 2767 | 0.1725 (0.0794) | 0.02973 | 0.179 (0.0351) | 3.52E-07 | 0.1302 |  |
| rs11689092 | 2 (25740595) | A (0.15) | 7565 | 0.1003 (0.0237) | 2.33E-05 | 1134 | 0.046 (0.06) | 0.4425 | 0.093 (0.022) | 2.46E-05 | 0.427 | DTNB |
| rs11684202 | 2 (25741062) | A (0.86) | 7565 | -0.1004 (0.0237) | 2.19E-05 | 2740 | -0.0726 (0.0423) | 0.08636 | -0.0938 (0.0207) | 5.78E-06 | 0.8261 | DTNB |
| rs11693439 | 2 (29620117) | T (0.04) | 7565 | 0.1927 (0.0412) | 2.96E-06 | 1134 | 0.0183 (0.1043) | 0.8604 | 0.1692 (0.0383) | 1.01E-05 | 0.1325 | ALK |
| rs11676871 | 2 (29620365) | A (0.92) | 7565 | -0.1839 (0.0417) | 1.02E-05 | 1134 | -0.0171 (0.1043) | 0.8696 | -0.1609 (0.0387) | 3.24E-05 | 0.155 | ALK |
| rs4849442 | 2 (111650690) | T (0.65) | 7565 | -0.0951 (0.0238) | 0.000065 | 2728 | -0.0227 (0.0268) | 0.3971 | -0.0631 (0.0178) | 3.86E-04 | 0.2799 | LOC729312 |
| rs4355062 | 2 (130285026) | T (0.86) | 7565 | 0.1275 (0.0307) | 3.21E-05 | 3866 | -0.0255 (0.0327) | 0.4358 | 0.0558 (0.0224) | 1.26E-02 | 0.0161 |  |
| rs799814 | 2 (154919608) | A (0.71) | 7565 | -0.0967 (0.023) | 0.000026 | 3888 | -0.0175 (0.0268) | 0.5145 | -0.0632 (0.0175) | 2.98E-04 | 0.2439 | GALNT13 |
| rs2080401 | 2 (171249069) | A (0.62) | 7565 | -0.0803 (0.0173) | 3.62E-06 | 1134 | -0.0218 (0.0436) | 0.6179 | -0.0723 (0.0161) | 6.84E-06 | 0.2346 |  |
| rs6706901 | 2 (171252417) | A (0.38) | 7565 | 0.08 (0.017) | 2.47E-06 | 3873 | 0.0237 (0.0229) | 0.3016 | 0.06 (0.0137) | 1.11E-05 | 0.4207 |  |
| rs2289086 | 2 (211993348) | T (0.46) | 7565 | -0.0677 (0.0169) | 6.04E-05 | 1134 | -0.0208 (0.0423) | 0.6231 | -0.0612 (0.0157) | 9.54E-05 | 0.3302 | ERBB4 |
| rs39667 | 3 (10458958) | T (0.82) | 7565 | 0.0532 (0.0217) | 0.01437 | 1134 | 0.0026 (0.0541) | 0.9612 | 0.0462 (0.0201) | 2.18E-02 | 0.4074 | ATP2B2 |
| rs688331 | 3 (10475517) | A (0.86) | 7565 | 0.0979 (0.0242) | 5.09E-05 | 3894 | 0.0281 (0.0319) | 0.378 | 0.0724 (0.0193) | 1.74E-04 | 0.1874 |  |
| rs7645442 | 3 (24853353) | T (0.52) | 7565 | -0.0544 (0.0168) | 0.001232 | 3862 | -0.0618 (0.0237) | 0.009157 | -0.0569 (0.0137) | 3.34E-05 | 0.6195 |  |
| rs1992964 | 3 (54438165) | A (0.75) | 7565 | -0.0749 (0.0191) | 8.68E-05 | 3894 | -0.0014 (0.0262) | 0.9581 | -0.0494 (0.0154) | 1.37E-03 | 0.05838 | CACNA2D3 |
| rs9882299 | 3 (54438944) | T (0.26) | 7565 | 0.069 (0.0192) | 0.000327 | 1134 | -0.0104 (0.0478) | 0.828 | 0.058 (0.0178) | 1.14E-03 | 0.1375 | CACNA2D3 |
| rs9917729 | 3 (123768391) | A (0.52) | 7565 | -0.0588 (0.0168) | 0.000466 | 1134 | -0.0084 (0.0433) | 0.8458 | -0.0522 (0.0157) | 8.57E-04 | 0.2855 | DTX3L |
| rs2332285 | 3 (123770900) | A (0.48) | 7565 | 0.0571 (0.0167) | 0.000633 | 3871 | -0.001 (0.0226) | 0.9656 | 0.0366 (0.0134) | 6.45E-03 | 0.2045 | DTX3L |
| rs11920719 | 3 (172317253) | A (0.77) | 7565 | -0.1146 (0.0226) | 3.93E-07 | 1134 | 0.0273 (0.0607) | 0.6527 | -0.0973 (0.0212) | 4.32E-06 | 0.02573 | TNIK |
| rs13108219 | 4 (23517988) | A (0.24) | 7565 | 0.0781 (0.0196) | 6.76E-05 | 3875 | -0.0194 (0.0262) | 0.4579 | 0.0431 (0.0157) | 6.03E-03 | 0.0127 |  |
| rs957615 | 4 (23518663) | A (0.21) | 7565 | 0.079 (0.0216) | 0.00026 | 1134 | -0.0671 (0.0506) | 0.1842 | 0.0564 (0.0199) | 4.49E-03 | 0.01104 |  |
| rs17637428 | 4 (42491847) | T (0.93) | 7565 | 0.1393 (0.0335) | 3.21E-05 | 1134 | -0.0633 (0.0796) | 0.4265 | 0.1088 (0.0309) | 4.25E-04 | 0.02604 |  |
| rs17637488 | 4 (42504877) | A (0.93) | 7565 | 0.1387 (0.0321) | 1.56E-05 | 3887 | -0.0634 (0.0478) | 0.1844 | 0.0758 (0.0266) | 4.42E-03 | 0.004346 |  |
| rs6843550 | 4 (69818579) | T (0.01) | 7565 | 0.1529 (0.0757) | 0.04346 | 1134 | -0.1547 (0.1779) | 0.3845 | 0.1058 (0.0697) | 1.29E-01 | 0.1257 |  |
| rs12509066 | 4 (69827407) | T (0.96) | 7565 | -0.2301 (0.0568) | 5.11E-05 | 3910 | -0.0401 (0.06) | 0.5036 | -0.1403 (0.0412) | 6.71E-04 | 0.3959 |  |
| rs7657924 | 4 (91362750) | A (0.05) | 7565 | -0.1426 (0.0409) | 0.000497 | 2751 | -0.039 (0.0627) | 0.5336 | -0.1117 (0.0342) | 1.11E-03 | 0.5842 |  |
| rs2662707 | 4 (121371650) | A (0.05) | 7565 | 0.1699 (0.0396) | 1.76E-05 | 1134 | -0.0559 (0.0942) | 0.5528 | 0.136 (0.0365) | 1.95E-04 | 0.03698 |  |
| rs1874464 | 5 (18892760) | T (0.79) | 7565 | -0.0699 (0.0204) | 0.000598 | 3871 | -0.0635 (0.0303) | 0.03594 | -0.0679 (0.0169) | 5.98E-05 | 0.8093 |  |
| rs2642778 | 5 (62109527) | A (0.5) | 7565 | 0.0714 (0.0166) | 1.63E-05 | 1134 | 0.0165 (0.0421) | 0.6955 | 0.064 (0.0154) | 3.41E-05 | 0.2405 | ISCA1L |
| rs2642781 | 5 (62110935) | A (0.51) | 7565 | -0.0706 (0.0165) | 1.88E-05 | 3916 | 0.012 (0.0231) | 0.6034 | -0.0426 (0.0134) | 1.49E-03 | 0.06331 |  |
| rs317985 | 5 (66773558) | T (0.05) | 7565 | -0.1569 (0.0374) | 2.66E-05 | 2764 | 0.0724 (0.0719) | 0.3142 | -0.1081 (0.0332) | 1.12E-03 | 0.001138 |  |
| rs870054 | 5 (90092594) | A (0.97) | 7565 | 0.1976 (0.0474) | 3.08E-05 | 2765 | 0.0729 (0.0736) | 0.3215 | 0.161 (0.0398) | 5.32E-05 | 0.5316 | GPR98 |
| rs266697 | 5 (95823620) | T (0.75) | 7565 | 0.0859 (0.0198) | 0.000014 | 2745 | 0.0175 (0.0306) | 0.5682 | 0.0658 (0.0166) | 7.70E-05 | 0.09022 |  |
| rs13161895 | 5 (179403807) | T (0.08) | 7565 | 0.1511 (0.0352) | 1.82E-05 | 3898 | 0.1386 (0.0518) | 0.007497 | 0.1471 (0.0291) | 4.34E-07 | 0.9931 | RNF130 |
| rs4129403 | 5 (179409216) | T (0.94) | 7565 | -0.1529 (0.0353) | 1.48E-05 | 1134 | -0.1423 (0.0893) | 0.111 | -0.1515 (0.0328) | 3.95E-06 | 0.9512 | RNF130 |
| rs3132488 | 6 (31350674) | T (0.86) | 7565 | 0.1027 (0.0243) | 2.29E-05 | 2750 | 0.0442 (0.04) | 0.2695 | 0.087 (0.0208) | 2.84E-05 | 0.3775 |  |
| rs2815732 | 6 (73208483) | A (0.25) | 7565 | 0.0788 (0.0194) | 4.81E-05 | 3886 | -0.0242 (0.0259) | 0.3491 | 0.0417 (0.0155) | 7.19E-03 | 0.03892 |  |
| rs2492965 | 6 (73211896) | T (0.27) | 7565 | 0.0794 (0.0196) | 5.26E-05 | 1134 | 0.0023 (0.0489) | 0.9631 | 0.0687 (0.0182) | 1.58E-04 | 0.1614 |  |
| rs9443580 | 6 (79260465) | T (0.96) | 7565 | -0.1839 (0.0427) | 1.68E-05 | 2753 | 0.0577 (0.0695) | 0.4064 | -0.1177 (0.0364) | 1.22E-03 | 0.03275 |  |
| rs986543 | 6 (114059862) | T (0.54) | 7565 | 0.0552 (0.0166) | 0.000911 | 3887 | 0.0187 (0.023) | 0.418 | 0.0427 (0.0135) | 1.52E-03 | 0.465 |  |
| rs12193545 | 6 (114062098) | T (0.5) | 7565 | -0.043 (0.0167) | 0.01025 | 1134 | -0.0346 (0.043) | 0.4208 | -0.0419 (0.0156) | 7.11E-03 | 0.8682 |  |
| rs2390852 | 7 (23984773) | A (0.83) | 7565 | -0.0889 (0.0221) | 5.58E-05 | 1134 | 0.0445 (0.0559) | 0.4267 | -0.0709 (0.0206) | 5.62E-04 | 0.0293 |  |
| rs918972 | 7 (23986287) | T (0.17) | 7565 | 0.0856 (0.0221) | 0.000109 | 3889 | 0.0282 (0.0313) | 0.3679 | 0.0665 (0.0181) | 2.30E-04 | 0.1077 |  |
| rs1796226 | 7 (65725145) | T (0.16) | 7565 | 0.0774 (0.0229) | 0.000739 | 3890 | -0.0218 (0.0312) | 0.4857 | 0.0427 (0.0185) | 2.08E-02 | 0.1317 |  |
| rs1796212 | 7 (65769431) | A (0.17) | 7565 | 0.0756 (0.0226) | 0.0008 | 1134 | 0.0292 (0.0578) | 0.613 | 0.0694 (0.021) | 9.69E-04 | 0.4683 |  |
| rs7022027 | 9 (87022992) | T (0.03) | 7565 | 0.2191 (0.051) | 1.76E-05 | 2752 | 0.0517 (0.0793) | 0.5143 | 0.1701 (0.0429) | 7.32E-05 | 0.3744 |  |
| rs2225713 | 10 (28173193) | A (0.16) | 7565 | -0.1004 (0.023) | 1.33E-05 | 2759 | 0.0275 (0.0369) | 0.4565 | -0.0646 (0.0195) | 9.33E-04 | 0.0004557 | ARMC4 |
| rs10882292 | 10 (95400822) | T (0.7) | 7565 | -0.0753 (0.0183) | 4.03E-05 | 1134 | 0.0619 (0.0461) | 0.1789 | -0.0566 (0.017) | 8.76E-04 | 0.006563 | PDE6C |
| rs10882293 | 10 (95401687) | T (0.71) | 7565 | -0.0762 (0.0183) | 3.13E-05 | 3861 | -0.0315 (0.025) | 0.2062 | -0.0606 (0.0148) | 4.04E-05 | 0.05819 | PDE6C |
| rs11195165 | 10 (112271945) | A (0.81) | 7565 | 0.0931 (0.0218) | 1.97E-05 | 2745 | 0.0135 (0.0337) | 0.6883 | 0.0697 (0.0183) | 1.42E-04 | 0.2013 |  |
| rs1887013 | 10 (129416932) | T (0.77) | 7565 | -0.087 (0.0213) | 4.56E-05 | 1134 | -0.041 (0.0541) | 0.4485 | -0.0808 (0.0198) | 4.54E-05 | 0.4539 |  |
| rs1887012 | 10 (129416983) | T (0.25) | 7565 | 0.075 (0.0196) | 0.000125 | 1134 | 0.0411 (0.0541) | 0.4477 | 0.0711 (0.0184) | 1.15E-04 | 0.5081 |  |
| rs11812953 | 10 (135170287) | T (0.12) | 7565 | 0.105 (0.0265) | 7.33E-05 | 2764 | -0.0334 (0.0386) | 0.3863 | 0.0607 (0.0218) | 5.50E-03 | 0.006539 |  |
| rs7939523 | 11 (22577548) | A (0.12) | 7565 | -0.104 (0.0261) | 6.75E-05 | 2769 | -0.0438 (0.0414) | 0.2891 | -0.0869 (0.0221) | 8.30E-05 | 0.1073 |  |
| rs10895547 | 11 (103313362) | T (0.23) | 7565 | -0.0807 (0.0196) | 3.83E-05 | 3884 | -0.0629 (0.0277) | 0.02297 | -0.0747 (0.016) | 2.95E-06 | 0.3413 | PDGFD |
| rs4145958 | 11 (103322855) | A (0.75) | 7565 | 0.0829 (0.0197) | 2.59E-05 | 1134 | 0.0867 (0.0495) | 0.08021 | 0.0834 (0.0183) | 5.20E-06 | 0.8979 | PDGFD |
| rs11215718 | 11 (115276150) | A (0.34) | 7565 | -0.0554 (0.0175) | 0.001574 | 1134 | -0.0036 (0.0445) | 0.9361 | -0.0484 (0.0163) | 2.93E-03 | 0.2921 |  |
| rs7129139 | 11 (115276354) | A (0.44) | 7565 | -0.0689 (0.017) | 4.93E-05 | 2749 | 0.0357 (0.0275) | 0.1942 | -0.04 (0.0145) | 5.70E-03 | 0.01571 |  |
| rs1105723 | 11 (130573399) | T (0.12) | 7565 | -0.1166 (0.0265) | 1.11E-05 | 2754 | -0.0475 (0.041) | 0.2462 | -0.0962 (0.0222) | 1.53E-05 | 0.6595 |  |
| rs815027 | 12 (33630081) | A (0.21) | 7565 | -0.0827 (0.0204) | 5.13E-05 | 2745 | -0.0094 (0.0326) | 0.7731 | -0.0621 (0.0173) | 3.32E-04 | 0.2808 |  |
| rs2686570 | 12 (113358839) | A (0.21) | 7565 | 0.0644 (0.0205) | 0.00169 | 1134 | 0.0115 (0.0512) | 0.8219 | 0.0571 (0.019) | 2.70E-03 | 0.3623 |  |
| rs2686573 | 12 (113363936) | A (0.24) | 7565 | 0.081 (0.0195) | 3.16E-05 | 3746 | 0.0158 (0.027) | 0.5591 | 0.0587 (0.0158) | 2.07E-04 | 0.1199 |  |
| rs4771088 | 13 (18798277) | A (0.29) | 7565 | 0.0619 (0.0183) | 0.000712 | 2761 | 0.0561 (0.0304) | 0.06487 | 0.0604 (0.0157) | 1.18E-04 | 0.6853 |  |
| rs4238154 | 13 (19873193) | C (0.2) | 7565 | -0.0852 (0.0209) | 4.53E-05 | 2763 | -0.0193 (0.0323) | 0.5506 | -0.0657 (0.0175) | 1.80E-04 | 0.3666 |  |
| rs944012 | 13 (19874831) | A (0.63) | 7565 | 0.0477 (0.0177) | 0.006959 | 1134 | 0.0499 (0.0444) | 0.2613 | 0.048 (0.0164) | 3.51E-03 | 0.9334 |  |
| rs7139556 | 13 (98036170) | A (0.07) | 7565 | -0.153 (0.0336) | 5.34E-06 | 2755 | -0.0127 (0.0522) | 0.8077 | -0.1118 (0.0282) | 7.50E-05 | 0.1748 |  |
| rs1854963 | 13 (110509127) | T (0.23) | 7565 | 0.0846 (0.0203) | 0.000032 | 1134 | -0.0263 (0.0521) | 0.6135 | 0.07 (0.0189) | 2.16E-04 | 0.05053 |  |
| rs11069878 | 13 (110509641) | C (0.76) | 7565 | -0.0858 (0.0203) | 2.43E-05 | 1134 | 0.026 (0.0521) | 0.6173 | -0.071 (0.0189) | 1.72E-04 | 0.04854 |  |
| rs17098343 | 14 (60959051) | T (0.15) | 7565 | -0.1011 (0.0239) | 2.39E-05 | 3893 | 0.0067 (0.0343) | 0.8452 | -0.0659 (0.0196) | 7.77E-04 | 0.1127 | PRKCH |
| rs12595292 | 15 (62940743) | A (0.12) | 7565 | 0.1177 (0.0257) | 4.47E-06 | 1134 | 0.0328 (0.0659) | 0.6187 | 0.1065 (0.0239) | 8.68E-06 | 0.2405 | PLEKHO2 |
| rs16948311 | 15 (62941185) | A (0.12) | 7565 | 0.1191 (0.0256) | 3.41E-06 | 3886 | 0.0058 (0.0355) | 0.8713 | 0.0804 (0.0208) | 1.09E-04 | 0.1524 | PLEKHO2 |
| rs7176166 | 15 (90063764) | C (0.04) | 7565 | 0.1934 (0.0434) | 8.28E-06 | 1825 | 0.081 (0.0839) | 0.3343 | 0.1696 (0.0385) | 1.08E-05 | 0.3535 |  |
| rs7203193 | 16 (11548681) | A (0.22) | 7565 | 0.0791 (0.02) | 7.87E-05 | 2750 | 0.0825 (0.0338) | 0.01479 | 0.08 (0.0172) | 3.40E-06 | 0.9239 |  |
| rs2550035 | 16 (70670917) | C (0.27) | 7565 | 0.0533 (0.019) | 0.005082 | 1134 | 0.063 (0.0477) | 0.1869 | 0.0546 (0.0177) | 1.97E-03 | 0.8183 |  |
| rs217181 | 16 (70671503) | T (0.18) | 7565 | 0.0882 (0.0214) | 3.94E-05 | 3881 | 0.0512 (0.0292) | 0.07977 | 0.0753 (0.0173) | 1.30E-05 | 0.2854 |  |
| rs16971380 | 16 (71488441) | C (0.45) | 7565 | 0.0693 (0.0169) | 3.93E-05 | 3837 | 0.0115 (0.0233) | 0.6204 | 0.0494 (0.0137) | 3.06E-04 | 0.01171 | ZFHX3 |
| rs16971384 | 16 (71488586) | A (0.55) | 7565 | -0.0688 (0.0168) | 4.22E-05 | 1134 | -0.0888 (0.0426) | 0.03695 | -0.0715 (0.0156) | 4.76E-06 | 0.6302 | ZFHX3 |
| rs2270501 | 16 (84490489) | T (0.04) | 7565 | -0.2944 (0.0858) | 0.000596 | 2754 | 0.2144 (0.0959) | 0.02537 | -0.0682 (0.0639) | 2.86E-01 | 0.0007127 | IRF8 |
| rs1532631 | 16 (86998749) | T (0.6) | 7565 | 0.0656 (0.0173) | 0.000155 | 3871 | -0.0037 (0.0231) | 0.8728 | 0.0407 (0.0138) | 3.29E-03 | 0.06124 |  |
| rs11651728 | 17 (3640149) | C (0.88) | 7565 | -0.1112 (0.0265) | 2.82E-05 | 3896 | 0.0073 (0.0399) | 0.8553 | -0.075 (0.0221) | 6.85E-04 | 0.06484 | ITGAE |
| rs2891 | 17 (3652275) | T (0.88) | 7565 | -0.0575 (0.0392) | 0.1432 | 1134 | -0.0223 (0.0665) | 0.7376 | -0.0484 (0.0338) | 1.52E-01 | 0.8335 | ITGAE |
| rs2676288 | 17 (60135967) | T (0.03) | 7565 | -0.197 (0.0489) | 5.53E-05 | 2764 | 0.0849 (0.0845) | 0.315 | -0.1262 (0.0423) | 2.85E-03 | 0.0136 |  |
| rs7234633 | 18 (59459275) | A (0.83) | 7565 | 0.107 (0.0224) | 1.73E-06 | 2648 | 0.0095 (0.036) | 0.7922 | 0.0798 (0.019) | 2.73E-05 | 0.1584 | SERPINB4 |
| rs11671653 | 19 (10699486) | A (0.11) | 7565 | 0.1237 (0.0273) | 5.77E-06 | 3880 | 0.0782 (0.0366) | 0.03261 | 0.1075 (0.0219) | 9.11E-07 | 0.1008 | DNM2 |
| rs1560734 | 19 (10702049) | T (0.89) | 7565 | -0.1289 (0.0273) | 2.43E-06 | 1134 | -0.055 (0.0694) | 0.4276 | -0.119 (0.0254) | 2.81E-06 | 0.3456 | DNM2 |
| rs11669133 | 19 (10953139) | A (0.06) | 7565 | -0.1522 (0.0346) | 1.11E-05 | 2761 | -0.2055 (0.0556) | 0.0002161 | -0.1671 (0.0294) | 1.27E-08 | 0.7621 | SMARCA4 |
| rs2965135 | 19 (49965244) | A (0.28) | 7565 | -0.0857 (0.0188) | 5.38E-06 | 2756 | -0.0237 (0.0285) | 0.4056 | -0.0668 (0.0157) | 2.03E-05 | 0.144 |  |
| rs4286333 | 20 (40187831) | T (0.93) | 7565 | 0.116 (0.0404) | 0.004081 | 2741 | 0.0186 (0.0501) | 0.7101 | 0.0776 (0.0315) | 1.36E-02 | 0.3631 | PTPRT |
| rs4810476 | 20 (43956001) | A (0.33) | 7565 | -0.0693 (0.0176) | 8.51E-05 | 3855 | 0.0388 (0.0246) | 0.1145 | -0.0327 (0.0143) | 2.24E-02 | 0.003501 | CTSA |
| rs4608591 | 20 (43957189) | T (0.67) | 7565 | 0.0697 (0.0179) | 0.000104 | 1134 | -0.0814 (0.044) | 0.064 | 0.0482 (0.0166) | 3.64E-03 | 0.001863 | CTSA |
| rs7283595 | 21 (14467111) | T (0.2) | 7565 | -0.0825 (0.0207) | 6.57E-05 | 3869 | -0.036 (0.0276) | 0.1914 | -0.0657 (0.0166) | 7.15E-05 | 0.6171 | LIPI |
| rs7282646 | 21 (14467221) | T (0.22) | 7565 | -0.0824 (0.0209) | 7.81E-05 | 1134 | -0.0059 (0.0524) | 0.911 | -0.0719 (0.0194) | 2.12E-04 | 0.1916 | LIPI |
| rs235979 | 21 (27459174) | T (0.18) | 7565 | -0.0895 (0.0217) | 0.000036 | 2752 | 0.0043 (0.0339) | 0.8981 | -0.0622 (0.0183) | 6.66E-04 | 0.06981 |  |
| rs5904726 | X (146130315) | A (0.47) | 7565 | 0.0863 (0.0183) | 2.57E-06 | 2744 | 0.0276 (0.0233) | 0.2355 | 0.0639 (0.0144) | 8.93E-06 | 0.5632 |  |
| 1Chromosomal position given on NCBI Build 36.1. 2The reference allele is on the forward strand. 3Number of cases/number of controls. | | | | | | | | | | | | |
