# Supplementary material for: Genome-Wide Association Study of Coronary Heart Disease and Its Risk Factors in 8,090 African Americans: The NHLBI CARe Project
Source: PLOS journal article supplement (doi:10.1371/journal.pgen.1001300), 2011-02-10
Supplement: S15 (10.1371/journal.pgen.1001300.s015) [file journal.pgen.1001300.s015]

**Table S9.** Type-2 diabetes replication results for SNPs from the CARe meta-analysis.

| **SNP** | **CHR (POS) 1** | **CARe** | | | | **Replication** | | | **Combined** | | | **Locus** |
| --- | --- | --- | --- | --- | --- | --- | --- | --- | --- | --- | --- | --- |
| **Effect allele (effect allele frequency)2** | **N3** | **OR [95% CI]** | **P-value** | **N3** | **OR [95% CI]** | **P-value** | **OR [95% CI]** | **P-value** | **Heterogeneity Q P-value** |
| rs10176505 | 2 (68375152) | C (0.89) | 1264/5678 | 0.735 [0.642-0.842] | 0.00000899 | 503/1659 | 1.014 [0.733-1.404] | 0.933 | 0.772 [0.68-0.875] | 5.60E-05 | 0.03747 | CNRIP1 |
| rs10176792 | 2 (68375246) | A (0.23) | 1264/5679 | 1.167 [1.051-1.296] | 0.003931 | 335/757 | 0.899 [0.694-1.165] | 0.4202 | 1.124 [1.019-1.24] | 0.01916 | 0.06752 | CNRIP1 |
| rs1830320 | 2 (145538850) | A (0.77) | 1264/5680 | 1.205 [1.078-1.346] | 0.001013 | 503/1659 | 1.057 [0.903-1.236] | 0.4929 | 1.153 [1.052-1.263] | 0.00225 | 0.3737 | LOC730124 |
| rs13015800 | 2 (145539125) | A (0.26) | 1264/5681 | 0.845 [0.76-0.94] | 0.001976 | 335/757 | 0.876 [0.716-1.073] | 0.2001 | 0.852 [0.775-0.937] | 0.000925 | 0.7597 | LOC730124 |
| rs13424957 | 2 (165458636) | T (0.19) | 1264/5682 | 0.749 [0.663-0.845] | 0.0000029 | 1238/2015 | 0.879 [0.767-1.006] | 0.06051 | 0.805 [0.735-0.881] | 2.57E-06 | 0.09567 |  |
| rs6720547 | 2 (165533647) | T (0.32) | 1264/5683 | 0.814 [0.734-0.903] | 0.0001016 | 335/757 | 1.043 [0.851-1.277] | 0.6866 | 0.858 [0.782-0.941] | 0.001177 | 0.03356 |  |
| rs9825199 | 3 (196385873) | T (0.45) | 1264/5684 | 1.12 [1.022-1.228] | 0.01542 | 335/757 | 1.013 [0.84-1.222] | 0.8925 | 1.098 [1.011-1.193] | 0.02692 | 0.3468 | C3orf21 |
| rs3796160 | 3 (196387903) | T (0.18) | 1264/5685 | 1.265 [1.133-1.412] | 0.0000305 | 503/1659 | 0.893 [0.731-1.09] | 0.2664 | 1.165 [1.057-1.283] | 0.002129 | 0.01071 | C3orf21 |
| rs10012190 | 4 (180139757) | T (0.75) | 1264/5686 | 0.728 [0.646-0.82] | 0.0000002 | 335/757 | 1.035 [0.823-1.301] | 0.7687 | 0.786 [0.706-0.874] | 9.62E-06 | 0.007624 |  |
| rs2044868 | 4 (180158493) | A (0.62) | 1264/5687 | 0.809 [0.737-0.888] | 0.00000923 | 503/1658 | 0.952 [0.811-1.118] | 0.5505 | 0.844 [0.778-0.915] | 4.28E-05 | 0.2259 |  |
| rs2896965 | 5 (118949038) | A (0.93) | 1264/5688 | 1.42 [1.158-1.742] | 0.000764 | 168/901 | 0.892 [0.559-1.425] | 0.6324 | 1.317 [1.091-1.59] | 0.00421 | 0.07472 |  |
| rs466712 | 5 (122481551) | A (0.14) | 1264/5689 | 1.236 [1.09-1.402] | 0.0009735 | 335/757 | 0.873 [0.663-1.149] | 0.3318 | 1.163 [1.036-1.305] | 0.01038 | 0.0243 | PRDM6 |
| rs179805 | 5 (122541713) | T (0.17) | 1264/5690 | 1.289 [1.146-1.45] | 0.0000237 | 503/1659 | 1.053 [0.869-1.276] | 0.5989 | 1.219 [1.102-1.348] | 0.000123 | 0.08232 | PRDM6 |
| rs9690418 | 7 (139010780) | A (0.59) | 1264/5691 | 0.842 [0.763-0.929] | 0.0006395 | 335/757 | 0.894 [0.743-1.077] | 0.2392 | 0.853 [0.782-0.932] | 0.000397 | 0.5741 |  |
| rs12707449 | 7 (139011268) | A (0.37) | 1264/5692 | 1.202 [1.092-1.322] | 0.0001577 | 503/1659 | 1.051 [0.895-1.233] | 0.5469 | 1.16 [1.068-1.259] | 0.000427 | 0.2107 |  |
| rs7819143 | 8 (40546085) | C (0.15) | 1264/5693 | 1.324 [1.172-1.495] | 0.00000639 | 1573/2772 | 0.946 [0.849-1.054] | 0.316 | 1.096 [1.01-1.188] | 0.02724 | 0.0009763 | ZMAT4 |
| rs12546688 | 8 (40546698) | T (0.17) | 1264/5694 | 1.334 [1.177-1.513] | 0.00000656 | 335/757 | 0.925 [0.711-1.202] | 0.5581 | 1.245 [1.111-1.395] | 0.000163 | 0.01361 | ZMAT4 |
| rs10811099 | 9 (19007723) | T (0.62) | 1264/5695 | 1.263 [1.113-1.434] | 0.0003125 | 503/1659 | 0.956 [0.807-1.133] | 0.6045 | 1.142 [1.031-1.265] | 0.01094 | 0.03524 | C9orf138 |
| rs7901695 | 10 (114744078) | T (0.55) | 1264/5696 | 0.812 [0.741-0.889] | 0.00000752 | 1238/2015 | 0.876 [0.783-0.981] | 0.02168 | 0.837 [0.779-0.899] | 9.92E-07 | 0.5091 | TCF7L2 |
| rs4506565 | 10 (114746031) | A (0.55) | 1264/5697 | 0.816 [0.745-0.894] | 0.000012 | 335/757 | 0.856 [0.695-1.054] | 0.1416 | 0.822 [0.756-0.894] | 4.94E-06 | 0.6813 | TCF7L2 |
| rs12575710 | 11 (63605906) | A (0.27) | 1264/5698 | 1.231 [1.114-1.36] | 0.0000446 | 503/1659 | 1.1 [0.91-1.329] | 0.3271 | 1.201 [1.099-1.313] | 5.36E-05 | 0.5838 | MACROD1 |
| rs9633997 | 11 (63609620) | T (0.41) | 1264/5699 | 1.127 [1.021-1.244] | 0.01797 | 335/757 | 1.092 [0.899-1.326] | 0.3735 | 1.119 [1.024-1.223] | 0.01268 | 0.7797 | MACROD1 |
| rs588217 | 11 (77261024) | A (0.22) | 1264/5700 | 0.766 [0.683-0.859] | 0.00000566 | 1573/2772 | 1.001 [0.903-1.109] | 0.9885 | 0.89 [0.825-0.961] | 0.003005 | 0.007808 | C11orf67 |
| rs648601 | 11 (77264558) | A (0.76) | 1264/5701 | 1.296 [1.153-1.456] | 0.000013 | 335/757 | 1.005 [0.807-1.252] | 0.9612 | 1.225 [1.104-1.359] | 0.000127 | 0.04555 |  |
| rs4964010 | 12 (26689656) | T (0.6) | 1264/5702 | 1.235 [1.122-1.359] | 0.000016 | 168/901 | 0.664 [0.456-0.966] | 0.03229 | 1.188 [1.082-1.305] | 0.000303 | 0.001676 | ITPR2 |
| rs11175936 | 12 (64514326) | A (0.65) | 1264/5703 | 0.823 [0.747-0.907] | 0.0000778 | 335/757 | 1.012 [0.835-1.227] | 0.9022 | 0.859 [0.787-0.937] | 0.000588 | 0.06053 | HMGA2 |
| rs7959396 | 12 (64543214) | A (0.7) | 1264/5704 | 0.813 [0.739-0.894] | 0.0000194 | 1573/2772 | 0.939 [0.847-1.041] | 0.2299 | 0.869 [0.81-0.932] | 8.92E-05 | 0.191 | HMGA2 |
| rs11844888 | 14 (31549461) | A (0.15) | 1264/5705 | 0.79 [0.68-0.918] | 0.002048 | 335/757 | 1.019 [0.785-1.324] | 0.8852 | 0.842 [0.739-0.96] | 0.01015 | 0.09752 |  |
| rs17098436 | 14 (31551145) | T (0.2) | 1264/5706 | 0.813 [0.72-0.917] | 0.0007519 | 503/1659 | 1.097 [0.921-1.308] | 0.2987 | 0.896 [0.811-0.99] | 0.03117 | 0.02227 |  |
| rs13313462 | 15 (45534066) | A (0.35) | 1264/5707 | 0.841 [0.762-0.929] | 0.0006099 | 503/1659 | 1.093 [0.918-1.302] | 0.3182 | 0.897 [0.823-0.978] | 0.01403 | 0.03319 |  |
| rs7175662 | 15 (45537289) | A (0.36) | 1264/5708 | 0.834 [0.756-0.921] | 0.0003149 | 335/757 | 1.118 [0.921-1.356] | 0.2589 | 0.887 [0.812-0.969] | 0.007733 | 0.00832 |  |
| rs11655196 | 17 (9627190) | T (0.72) | 1264/5709 | 0.809 [0.732-0.893] | 0.000028 | 1573/2772 | 0.958 [0.832-1.104] | 0.5543 | 0.856 [0.789-0.929] | 0.00019 | 0.06498 | DHRS7C |
| rs17810040 | 17 (9629226) | A (0.69) | 1264/5710 | 0.827 [0.751-0.911] | 0.0001224 | 335/757 | 0.791 [0.615-1.018] | 0.06837 | 0.822 [0.751-0.901] | 2.56E-05 | 0.7478 | DHRS7C |
| rs9946939 | 18 (9521484) | A (0.55) | 1264/5711 | 0.834 [0.761-0.913] | 0.0000965 | 335/757 | 1.062 [0.883-1.278] | 0.523 | 0.875 [0.806-0.95] | 0.001477 | 0.02154 | RALBP1 |
| rs1942150 | 18 (9528533) | A (0.57) | 1264/5712 | 0.815 [0.743-0.894] | 0.0000158 | 503/1659 | 1.053 [0.893-1.243] | 0.5386 | 0.867 [0.8-0.941] | 0.000614 | 0.0282 | RALBP1 |
| rs2363797 | X (67055647) | T (0.33) | 1264/5713 | 1.234 [1.113-1.368] | 0.0000641 | 168/901 | 0.904 [0.741-1.103] | 0.3201 | 1.154 [1.053-1.266] | 0.002289 | 0.006616 |  |
| 1Chromosomal position given on NCBI Build 36.1. 2The reference allele is on the forward strand. 3Number of cases/number of controls. | | | | | | | | | | | | |
