# Supplementary material for: Genome-Wide Association Study of Coronary Heart Disease and Its Risk Factors in 8,090 African Americans: The NHLBI CARe Project
Source: PLOS journal article supplement (doi:10.1371/journal.pgen.1001300), 2011-02-10
Supplement: S17 (10.1371/journal.pgen.1001300.s017) [file journal.pgen.1001300.s017]

**Table S11.** CARe meta-analysis association results (including data from ARIC, CARDIA, CFS, JHS, and MESA) for the SNPs associated with coronary heart disease and its risk factors in Caucasians. In yellow, we highlight the five loci where association signals in African Americans define smaller genomic intervals to search for causal allele(s).

| **TRAIT** | **Reported Gene(s)** | **SNP** | **Proxy** | ***r*2 in CEU** | ***r*2 in YRI** | **Effect allele** | **Other allele** | **Effect allele frequency** | **OR/BETA** | **SE** | **Meta-analysis Pvalue** |
| --- | --- | --- | --- | --- | --- | --- | --- | --- | --- | --- | --- |
| Smoking | CTNNA3 | rs4142041 |  |  |  | a | g | 0.8915 | 0.0161 | 0.0441 | 0.7146 |
| Smoking | CHRNA3,CHRNA5,CHRNB4 | rs1051730 |  |  |  | a | g | 0.1159 | 0.0035 | 0.044 | 0.936 |
| Smoking | NR | rs2836823 |  |  |  | t | c | 0.0858 | 0.0437 | 0.048 | 0.3621 |
|  |  |  |  |  |  |  |  |  |  |  |  |
| Hypertension | CACNB2 | rs11014166 |  |  |  | NA | NA | NA | NA | NA | NA |
| Hypertension | c10orf107, TMEM26, RTKN2, RHOBTB1, ARID5B | rs1530440 |  |  |  | t | c | 0.0647 | 1.048 | 0.1026 | 0.6481 |
| Hypertension | CYP17A1 | rs1004467 |  |  |  | a | g | 0.7955 | 1.071 | 0.0511 | 0.1784 |
| Hypertension | CYP17A1, AS3MT, CNNM2, NT5C2 | rs11191548 |  |  |  | t | c | 0.9525 | 1.150 | 0.0881 | 0.1128 |
| Hypertension | PLEKHA7 | rs11024074 |  |  |  | t | c | 0.6937 | 0.957 | 0.0407 | 0.2816 |
| Hypertension | PLEKHA7 | rs381815 |  |  |  | NA | NA | NA | NA | NA | NA |
| Hypertension | ATP2B1 | rs2681472 |  |  |  | a | g | 0.8671 | 1.044 | 0.063 | 0.4916 |
| Hypertension | ATP2B1 | rs2681492 |  |  |  | t | c | 0.8725 | 1.044 | 0.058 | 0.4611 |
| Hypertension | SH2B3 | rs3184504 |  |  |  | t | c | 0.1324 | 1.192 | 0.0724 | 0.01514 |
| Hypertension | ATXN2, SH2B3 | rs653178 |  |  |  | t | c | 0.9194 | 0.833 | 0.0918 | 0.04607 |
| Hypertension | TBX3, TBX5 | rs2384550 |  |  |  | a | g | 0.3349 | 0.904 | 0.0396 | 0.01074 |
| Hypertension | ALDH1A2 | rs1550576 |  |  |  | NA | NA | NA | NA | NA | NA |
| Hypertension | CSK, ULK3 | rs6495122 |  |  |  | a | c | 0.6918 | 1.005 | 0.0443 | 0.9162 |
| Hypertension | CYP1A1, CYP1A2, CSK, LMAN1L, CPLX3, ARID3B | rs1378942 |  |  |  | a | c | 0.119 | 0.967 | 0.0614 | 0.5808 |
| Hypertension | NR | rs2398162 |  |  |  | a | g | 0.9142 | 0.994 | 0.0669 | 0.9287 |
| Hypertension | CDH13 | rs11646213 |  |  |  | a | t | 0.7296 | 0.926 | 0.0833 | 0.3591 |
| Hypertension | PLCD3, ACBD4, HEXIM1, HEXIM2 | rs12946454 |  |  |  | NA | NA | NA | NA | NA | NA |
| Hypertension | ZNF652, PHB | rs16948048 |  |  |  | a | g | 0.6211 | 1.022 | 0.0383 | 0.5673 |
| Hypertension | CASZ1 | rs12046278 |  |  |  | NA | NA | NA | NA | NA | NA |
| Hypertension | MTHFR, NPPA, CLCN6, NPPB, AGTRAP | rs17367504 |  |  |  | a | g | 0.8929 | 0.968 | 0.0611 | 0.592 |
| Hypertension | RYR2,CHRM3,ZP4 | rs2820037 |  |  |  | a | t | 0.6355 | 0.998 | 0.0388 | 0.9575 |
| Hypertension | ZNF831, EDN3 | rs16982520 |  |  |  | a | g | 0.8169 | 0.924 | 0.0492 | 0.1078 |
| Hypertension | ULK4 | rs9815354 |  |  |  | NA | NA | NA | NA | NA | NA |
| Hypertension | MDS1 | rs448378 |  |  |  | a | g | 0.4917 | 1.021 | 0.0375 | 0.5872 |
| Hypertension | MDS1 | rs1918974 |  |  |  | t | c | 0.5894 | 0.986 | 0.0413 | 0.7393 |
| Hypertension | FGF5, PRDM8, c4orf22 | rs16998073 |  |  |  | NA | NA | NA | NA | NA | NA |
| Hypertension | ADH7 | rs991316 |  |  |  | t | c | 0.4559 | 1.007 | 0.0378 | 0.8452 |
| Hypertension | MSRA | rs11775334 |  |  |  | a | g | 0.6215 | 0.999 | 0.0406 | 0.9872 |
|  |  |  |  |  |  |  |  |  |  |  |  |
| Coronary heart disease | CXCL12 | rs1746048 |  |  |  | t | c | 0.46 | 1.006 | 0.0969 | 0.953 |
| Coronary heart disease | CXCL12 | rs501120 |  |  |  | t | c | 0.5886 | 1.015 | 0.0966 | 0.8785 |
| Coronary heart disease | HNF1A,C12orf43 | rs2259816 |  |  |  | t | g | 0.1398 | 0.902 | 0.1409 | 0.4631 |
| Coronary heart disease | SMAD3 | rs17228212 |  |  |  | t | c | 0.8662 | 1.038 | 0.1429 | 0.795 |
| Coronary heart disease | NR | rs8055236 |  |  |  | t | g | 0.5434 | 1.084 | 0.0943 | 0.3918 |
| Coronary heart disease | LDLR | rs1122608 |  |  |  | t | g | 0.0572 | 1.051 | 0.2716 | 0.8535 |
| Coronary heart disease | CELSR2, PSRC1, SORT1 | rs646776 |  |  |  | t | c | 0.6438 | 1.145 | 0.1 | 0.1756 |
| Coronary heart disease | PSRC1 | rs599839 |  |  |  | a | g | 0.2615 | 0.996 | 0.1131 | 0.97 |
| Coronary heart disease | PCSK9 | rs11206510 |  |  |  | t | c | 0.8635 | 1.064 | 0.14 | 0.6556 |
| Coronary heart disease | MIA3 | rs17465637 |  |  |  | NA | NA | NA | NA | NA | NA |
| Coronary heart disease | NR | rs17672135 |  |  |  | t | c | 0.9019 | 0.892 | 0.1564 | 0.463 |
| Coronary heart disease | SLC5A3, MRPS6, KCNE2 | rs9982601 |  |  |  | NA | NA | NA | NA | NA | NA |
| Coronary heart disease | NR | rs688034 |  |  |  | t | c | 0.0966 | 1.050 | 0.1607 | 0.7628 |
| Coronary heart disease | WDR12 | rs6725887 |  |  |  | t | c | 0.9681 | 1.143 | 0.2847 | 0.6396 |
| Coronary heart disease | pseudogene | rs2943634 |  |  |  | a | c | 0.5827 | 0.992 | 0.0956 | 0.9348 |
| Coronary heart disease | MRAS | rs9818870 |  |  |  | t | c | 0.091 | 0.916 | 0.1778 | 0.6215 |
| Coronary heart disease | PHACTR1 | rs12526453 |  |  |  | c | g | 0.8453 | 1.308 | 0.145 | 0.06444 |
| Coronary heart disease | MTHFD1L | rs6922269 |  |  |  | a | g | 0.5475 | 0.991 | 0.0958 | 0.9244 |
| Coronary heart disease | CDKN2A, CDKN2B | rs4977574 |  |  |  | a | g | 0.8224 | 0.847 | 0.1201 | 0.1666 |
| rs6475606 | Yes | 1 | 0.001 | t | c | 0.8917 | 1.992 | 0.2018 | 0.0006411 |
| Coronary heart disease | Intergenic | rs1333049 |  |  |  | c | g | 0.2341 | 1.230 | 0.1083 | 0.05583 |
| Coronary heart disease | CDKN2A,CDKN2B | rs10757278 |  |  |  | a | g | 0.758 | 0.856 | 0.1171 | 0.1841 |
|  |  |  |  |  |  |  |  |  |  |  |  |
| Type-2 diabetes | CDC123,CAMK1D | rs12779790 |  |  |  | a | g | 0.8205 | 0.912 | 0.0723 | 0.2005 |
| Type-2 diabetes | HHEX | rs1111875 |  |  |  | t | c | 0.2291 | 0.961 | 0.0558 | 0.4772 |
| Type-2 diabetes | HHEX | rs5015480 |  |  |  | t | c | 0.379 | 1.027 | 0.0479 | 0.5817 |
| Type-2 diabetes | TCF7L2 | rs4506565 |  |  |  | a | t | 0.5541 | 0.816 | 0.0465 | 0.000012 |
| Type-2 diabetes | TCF7L2 | rs7901695 |  |  |  | t | c | 0.5523 | 0.812 | 0.0466 | 0.000007515 |
| Type-2 diabetes | TCF7L2 | rs7903146 |  |  |  | t | c | 0.3171 | 1.327 | 0.055 | 0.000000279 |
| Type-2 diabetes | Intergenic | rs9300039 |  |  |  | a | c | 0.1157 | 1.005 | 0.0719 | 0.941 |
| Type-2 diabetes | KCNJ11 | rs5219 |  |  |  | NA | NA | NA | NA | NA | NA |
| Type-2 diabetes | KCNJ11 | rs5215 |  |  |  | t | c | 0.9036 | 0.925 | 0.0819 | 0.3385 |
| Type-2 diabetes | KCNQ1 | rs2237897 |  |  |  | NA | NA | NA | NA | NA | NA |
| Type-2 diabetes | KCNQ1 | rs2237892 |  |  |  | t | c | 0.1416 | 0.932 | 0.0796 | 0.3788 |
| Type-2 diabetes | NR | rs12304921 |  |  |  | a | g | 0.8204 | 0.989 | 0.0606 | 0.8554 |
| Type-2 diabetes | DCD | rs1153188 |  |  |  | a | t | 0.764 | 0.948 | 0.0547 | 0.3245 |
| Type-2 diabetes | NR | rs1495377 |  |  |  | c | g | 0.7495 | 0.961 | 0.0537 | 0.458 |
| Type-2 diabetes | TSPAN8,LGR5 | rs7961581 |  |  |  | t | c | 0.7956 | 1.007 | 0.057 | 0.9044 |
| Type-2 diabetes | FTO | rs8050136 |  |  |  | a | c | 0.4349 | 0.988 | 0.047 | 0.7994 |
| Type-2 diabetes | FTO | rs9939609 |  |  |  | a | t | 0.4792 | 0.984 | 0.0468 | 0.7343 |
| Type-2 diabetes | NOTCH2, ADAM30 | rs10923931 |  |  |  | t | g | 0.3259 | 1.009 | 0.0492 | 0.8532 |
| Type-2 diabetes | THADA | rs7578597 |  |  |  | t | c | 0.7241 | 1.021 | 0.0526 | 0.6918 |
| Type-2 diabetes | Intergenic | rs6712932 |  |  |  | t | c | 0.7189 | 1.114 | 0.0695 | 0.1193 |
| Type-2 diabetes | LOC64673, IRS1 | rs2943641 |  |  |  | t | c | 0.3349 | 0.974 | 0.05 | 0.5929 |
| Type-2 diabetes | NR | rs358806 |  |  |  | a | c | 0.108 | 1.059 | 0.0736 | 0.4343 |
| Type-2 diabetes | ADAMTS9 | rs4607103 |  |  |  | t | c | 0.2938 | 1.054 | 0.0504 | 0.2993 |
| Type-2 diabetes | SYN2, PPARG | rs17036101 |  |  |  | a | g | 0.0267 | 0.950 | 0.1599 | 0.7472 |
| Type-2 diabetes | PPARG | rs1801282 |  |  |  | c | g | 0.9757 | 1.144 | 0.1689 | 0.425 |
| Type-2 diabetes | IGF2BP2 | rs6769511 |  |  |  | t | c | 0.2637 | 0.946 | 0.0567 | 0.325 |
| Type-2 diabetes | IGF2BP2 | rs4402960 |  |  |  | t | g | 0.5137 | 1.062 | 0.0467 | 0.1976 |
| Type-2 diabetes | WFS1, PPP2R2C | rs4689388 |  |  |  | a | g | 0.6763 | 1.022 | 0.0614 | 0.7271 |
| Type-2 diabetes | NR | rs7659604 |  |  |  | t | c | 0.6804 | 0.977 | 0.0496 | 0.6333 |
| Type-2 diabetes | LOC72901, CETN3 | rs12518099 |  |  |  | a | g | 0.7385 | 1.080 | 0.059 | 0.1943 |
| Type-2 diabetes | VEGFA | rs9472138 |  |  |  | t | c | 0.1949 | 1.047 | 0.0577 | 0.4211 |
| Type-2 diabetes | CDKAL1 | rs4712523 |  |  |  | a | g | 0.4069 | 0.968 | 0.0483 | 0.5043 |
| Type-2 diabetes | CDKAL1 | rs4712524 |  |  |  | NA | NA | NA | NA | NA | NA |
| Type-2 diabetes | CDKAL1 | rs6931514 |  |  |  | a | g | 0.7241 | 0.984 | 0.0542 | 0.7621 |
| Type-2 diabetes | CDKAL1 | rs9465871 |  |  |  | t | c | 0.4658 | 0.969 | 0.047 | 0.4989 |
| Type-2 diabetes | CDKAL1 | rs7754840 |  |  |  | c | g | 0.5759 | 1.026 | 0.0476 | 0.5883 |
| Type-2 diabetes | CDKAL1 | rs7756992 |  |  |  | a | g | 0.4295 | 0.969 | 0.047 | 0.5045 |
| Type-2 diabetes | CDKAL1 | rs10946398 |  |  |  | a | c | 0.424 | 0.976 | 0.0476 | 0.6128 |
| Type-2 diabetes | JAZF1 | rs864745 |  |  |  | t | c | 0.731 | 1.055 | 0.0537 | 0.3212 |
| Type-2 diabetes | SLC30A8 | rs13266634 |  |  |  | t | c | 0.1444 | 0.946 | 0.0888 | 0.5322 |
| Type-2 diabetes | CDKN2A, CDKN2B | rs2383208 |  |  |  | a | g | 0.8122 | 1.019 | 0.0593 | 0.7555 |
| Type-2 diabetes | CDKN2A,CDKN2B | rs7020996 |  |  |  | t | c | 0.3287 | 1.081 | 0.0579 | 0.1777 |
| Type-2 diabetes | CDKN2A,CDKN2B | rs10811661 |  |  |  | t | c | 0.9367 | 1.094 | 0.0985 | 0.3614 |
| Type-2 diabetes | CDKN2A, CDKN2B | rs564398 |  |  |  | t | c | 0.9232 | 1.000 | 0.0941 | 0.996 |
|  |  |  |  |  |  |  |  |  |  |  |  |
| LDL-C | FADS2, FADS3 | rs174570 |  |  |  | t | c | 0.0429 | -0.0672 | 0.0426 | 0.1144 |
| LDL-C | FADS1, FADS2 | rs174546 |  |  |  | t | c | 0.1148 | -0.0388 | 0.0312 | 0.2131 |
| LDL-C | APOA1, APOA4, APOA5, APOC3 | rs12272004 |  |  |  | a | c | 0.1491 | -0.0152 | 0.0232 | 0.512 |
| LDL-C | APOA1,APOC3,APOA5 | rs6589566 |  |  |  | a | g | 0.9853 | -0.077 | 0.0716 | 0.2822 |
| LDL-C | HNF1A | rs2650000 |  |  |  | a | c | 0.1184 | 0.0186 | 0.026 | 0.4734 |
| LDL-C | CETP | rs3764261 |  |  |  | a | c | 0.3052 | -0.0295 | 0.0239 | 0.2166 |
| LDL-C | NCAN | rs2304130 |  |  |  | a | g | 0.7868 | -0.0123 | 0.0267 | 0.6445 |
| LDL-C | NCAN, CILP2, PBX4 | rs10401969 |  |  |  | t | c | 0.8269 | -0.0293 | 0.0222 | 0.1867 |
| LDL-C | NCAN,CILP2 | rs16996148 |  |  |  | t | g | 0.1571 | 0.0223 | 0.0229 | 0.3297 |
| LDL-C | LDLR | rs2228671 |  |  |  | t | c | 0.0301 | -0.0712 | 0.0759 | 0.3484 |
| LDL-C | LDLR | rs11668477 |  |  |  | a | g | 0.3512 | 0.0688 | 0.0273 | 0.01161 |
| LDL-C | LDLR | rs6511720 |  |  |  | t | g | 0.1652 | -0.2077 | 0.0381 | 5.134E-08 |
| LDL-C | TOMM40, APOE | rs157580 |  |  |  | NA | NA | NA | NA | NA | NA |
| LDL-C | APOE, APOC1, APOC4, APOC2 | rs4420638 |  |  |  | a | g | 0.8013 | -0.0021 | 0.021 | 0.9197 |
| LDL-C | CELSR2, PSRC1, SORT1 | rs12740374 |  |  |  | t | g | 0.2514 | -0.1744 | 0.0208 | 5.745E-17 |
| LDL-C | CELSR2,PSRC1 | rs599839 |  |  |  | a | g | 0.2688 | 0.0738 | 0.0194 | 0.0001473 |
| LDL-C | CELSR2,PSRC1,SORT1 | rs646776 |  |  |  | t | c | 0.6431 | 0.1325 | 0.0175 | 4.052E-14 |
| LDL-C | DOCK7 | rs10889353 |  |  |  | a | c | 0.6184 | 0.0492 | 0.0169 | 0.00363 |
| LDL-C | rs10889335 | yes | 0.962 | 0.771 | a | g | 0.5917 | 0.0682 | 0.0175 | 9.64E-05 |
| LDL-C | PCSK9 | rs11591147 |  |  |  | NA | NA | NA | NA | NA | NA |
| LDL-C | PCSK9 | rs11206510 |  |  |  | t | c | 0.8634 | 0.0486 | 0.0241 | 0.04432 |
| LDL-C | CR1L | rs4844614 |  |  |  | t | g | 0.2652 | 0.0334 | 0.0188 | 0.07537 |
| LDL-C | MAFB | rs6102059 |  |  |  | t | c | 0.4173 | -0.0359 | 0.017 | 0.03542 |
| LDL-C | ABCG5 | rs6756629 |  |  |  | a | g | 0.0757 | -0.0463 | 0.0334 | 0.1647 |
| LDL-C | ABCG8 | rs6544713 |  |  |  | t | c | 0.1924 | 0.0476 | 0.0229 | 0.0376 |
| LDL-C | GCKR | rs780094 |  |  |  | t | c | 0.1809 | 0.0104 | 0.0217 | 0.6314 |
| LDL-C | APOB | rs515135 |  |  |  | NA | NA | NA | NA | NA | NA |
| LDL-C | APOB | rs693 |  |  |  | a | g | 0.2311 | 0.0274 | 0.0201 | 0.1728 |
| LDL-C | APOB | rs562338 |  |  |  | a | g | 0.5979 | -0.0893 | 0.0173 | 2.265E-07 |
| LDL-C | rs503662 | yes | 0.626 | 0.123 | t | c | 0.6518 | -0.1102 | 0.0183 | 1.62E-09 |
| LDL-C | HMGCR | rs3846662 |  |  |  | a | g | 0.1369 | -0.0154 | 0.031 | 0.6183 |
| LDL-C | HMGCR | rs3846663 |  |  |  | t | c | 0.2405 | 0.0242 | 0.0193 | 0.2092 |
| LDL-C | HMGCR | rs7703051 |  |  |  | a | c | 0.3347 | 0.0336 | 0.0174 | 0.05324 |
| LDL-C | HMGCR | rs12654264 |  |  |  | a | t | 0.6759 | -0.0326 | 0.0176 | 0.0639 |
| LDL-C | TIMD4, HAVCR1 | rs1501908 |  |  |  | c | g | 0.3756 | 0.0261 | 0.0173 | 0.1306 |
| LDL-C | B3GALT4 | rs2254287 |  |  |  | c | g | 0.5062 | 0.0133 | 0.0174 | 0.4444 |
| LDL-C | DNAH11 | rs12670798 |  |  |  | t | c | 0.6777 | 0.0086 | 0.0179 | 0.6295 |
| LDL-C | TRIB1 | rs6987702 |  |  |  | t | c | 0.2969 | 0.0041 | 0.0202 | 0.84 |
| LDL-C | AR | rs5031002 |  |  |  | NA | NA | NA | NA | NA | NA |
|  |  |  |  |  |  |  |  |  |  |  |  |
| HDL-C | MADD, FOLH1 | rs7395662 |  |  |  | a | g | 0.5661 | -0.0403 | 0.0165 | 0.01473 |
| HDL-C | NR1H3 | rs7120118 |  |  |  | t | c | 0.5338 | 0.0034 | 0.0166 | 0.8398 |
| HDL-C | FADS2, FADS3 | rs174570 |  |  |  | t | c | 0.043 | 0.0063 | 0.0417 | 0.8803 |
| HDL-C | FADS1, FADS2, FADS3 | rs174547 |  |  |  | t | c | 0.9071 | 0.0551 | 0.0297 | 0.06366 |
| rs1535 | yes | 1 | 0.09 | a | g | 0.7872 | 0.102 | 0.0252 | 5.17E-05 |
| HDL-C | APOA1, APOC3, APOA4, APOA5 | rs964184 |  |  |  | c | g | 0.7956 | 0.0266 | 0.0204 | 0.1914 |
| HDL-C | MMAB,MVK | rs2338104 |  |  |  | c | g | 0.2747 | -0.0287 | 0.0183 | 0.1171 |
| HDL-C | LIPC | rs1532085 |  |  |  | a | g | 0.4916 | 0.0479 | 0.0168 | 0.004242 |
| HDL-C | LIPC | rs10468017 |  |  |  | t | c | 0.1947 | 0.0621 | 0.0228 | 0.006384 |
| HDL-C | LIPC | rs1800588 |  |  |  | t | c | 0.497 | 0.102 | 0.0178 | 9.064E-09 |
| rs8034802 | yes | 0.659 | 0.191 | a | t | 0.3623 | 0.1036 | 0.0168 | 7.41E-10 |
| HDL-C | LIPC | rs4775041 |  |  |  | c | g | 0.1262 | 0.052 | 0.0243 | 0.03228 |
| HDL-C | CETP | rs1532624 |  |  |  | a | c | 0.1883 | 0.0428 | 0.0322 | 0.1836 |
| HDL-C | CETP | rs173539 |  |  |  | NA | NA | NA | NA | NA | NA |
| HDL-C | CETP | rs1800775 |  |  |  | a | c | 0.608 | 0.1505 | 0.0188 | 1.163E-15 |
| HDL-C | CETP | rs3764261 |  |  |  | a | c | 0.3051 | 0.2033 | 0.0233 | 2.799E-18 |
| HDL-C | CETP | rs1864163 |  |  |  | a | g | 0.2788 | -0.1798 | 0.0223 | 6.905E-16 |
| rs7499892 | yes | 0.666 | 0.271 | t | c | 0.3744 | -0.206 | 0.0225 | 5.02E-20 |
| HDL-C | CETP | rs9989419 |  |  |  | a | g | 0.579 | 0.0091 | 0.017 | 0.5928 |
| HDL-C | CTCF, PRMT8 | rs2271293 |  |  |  | a | g | 0.0755 | 0.1144 | 0.0307 | 0.0001935 |
| HDL-C | LCAT | rs2271293 |  |  |  | a | g | 0.0755 | 0.1144 | 0.0307 | 0.0001935 |
| HDL-C | LCAT | rs255049 |  |  |  | t | c | 0.3321 | -0.0783 | 0.0187 | 0.00002804 |
| HDL-C | LCAT | rs255052 |  |  |  | a | g | 0.2175 | 0.1317 | 0.0199 | 3.411E-11 |
| HDL-C | Intergenic | rs9891572 |  |  |  | t | c | 0.1749 | 0.0226 | 0.0215 | 0.2937 |
| HDL-C | LIPG | rs4939883 |  |  |  | t | c | 0.4599 | -0.0307 | 0.0164 | 0.06214 |
| HDL-C | LIPG | rs2156552 |  |  |  | a | t | 0.0406 | -0.0486 | 0.0415 | 0.2415 |
| HDL-C | ANGPTL4 | rs2967605 |  |  |  | t | c | 0.2124 | -0.0493 | 0.0199 | 0.01341 |
| HDL-C | TOMM40, APOE | rs157580 |  |  |  | NA | NA | NA | NA | NA | NA |
| HDL-C | GALNT2 | rs4846914 |  |  |  | a | g | 0.1376 | 0.0708 | 0.0244 | 0.003715 |
| HDL-C | GALNT2 | rs2144300 |  |  |  | t | c | 0.1426 | 0.0918 | 0.0285 | 0.001283 |
| HDL-C | PLTP | rs7679 |  |  |  | t | c | 0.9583 | 0.052 | 0.0414 | 0.2088 |
| rs6065904 | yes | 0.724 | 0 | g | a | 0.202 | 0.0904 | 0.0225 | 5.80E-05 |
| HDL-C | HNF4A | rs1800961 |  |  |  | t | c | 0.0098 | 0.0411 | 0.1559 | 0.7924 |
| HDL-C | APOB | rs6754295 |  |  |  | t | g | 0.7227 | -0.0216 | 0.0182 | 0.2372 |
| HDL-C | LPL | rs2083637 |  |  |  | a | g | 0.7498 | -0.0626 | 0.0198 | 0.001543 |
| HDL-C | LPL | rs12678919 |  |  |  | a | g | 0.8407 | -0.0849 | 0.0263 | 0.001259 |
| HDL-C | LPL | rs328 |  |  |  | c | g | 0.8912 | -0.153 | 0.0334 | 0.000004574 |
| HDL-C | LPL | rs10503669 |  |  |  | a | c | 0.0587 | 0.1371 | 0.0345 | 0.00007248 |
| rs10096633 | yes | 0.929 | 0.037 | t | c | 0.4302 | 0.1008 | 0.0167 | 1.48E-09 |
| HDL-C | TTC39B | rs471364 |  |  |  | t | c | 0.7996 | 0.0052 | 0.0204 | 0.7968 |
| HDL-C | ABCA1 | rs3905000 |  |  |  | a | g | 0.1613 | -0.043 | 0.022 | 0.05053 |
| rs13284054 | yes | 0.734 | 0.103 | c | t | 0.8503 | -0.09 | 0.0273 | 0.0009654 |
| HDL-C | ABCA1 | rs1883025 |  |  |  | t | c | 0.329 | -0.0233 | 0.0206 | 0.2573 |
| HDL-C | ABCA1 | rs3890182 |  |  |  | a | g | 0.1242 | -0.0439 | 0.0247 | 0.07511 |
| HDL-C | ABCA1 | rs4149268 |  |  |  | t | c | 0.6726 | -0.0088 | 0.0175 | 0.6141 |
